# Supplementary material
Source: publisher site journal article supplement (https://www.dovepress.com/article/370082)
Supplement: Supplementary file 1 [file get_supplementary_file.php]

| age | age group | sex | disease | surgery      |
|-----|-----------|-----|---------|--------------|
| 36  | -64       | f   | others  | gonio-bypass |
| 95  | 90-       | f   | others  | filtering    |
| 67  | 65-74     | m   | poag    | gonio-bypass |
| 56  | -64       | f   | pacd    | ce/gsl       |
| 60  | -64       | f   | pacd    | gonio-bypass |
| 56  | -64       | f   | pacd    | ce/gsl       |
| 82  | 75-89     | f   | others  | long-tube    |
| 83  | 75-89     | f   | poag    | filtering    |
| 94  | 90-       | f   | pacd    | ce/gsl       |
| 78  | 75-89     | m   | poag    | filtering    |
| 94  | 90-       | f   | pacd    | ce/gsl       |
| 70  | 65-74     | m   | poag    | gonio-bypass |
| 81  | 75-89     | f   | exg     | gonio-bypass |
| 83  | 75-89     | f   | poag    | filtering    |
| 53  | -64       | f   | poag    | gonio-bypass |
| 77  | 75-89     | m   | poag    | gonio-bypass |
| 60  | -64       | m   | poag    | gonio-bypass |
| 77  | 75-89     | m   | poag    | gonio-bypass |
| 83  | 75-89     | m   | poag    | long-tube    |
| 10  | -64       | f   | develop | gonio-bypass |
| 53  | -64       | f   | poag    | gonio-bypass |
| 68  | 65-74     | f   | pacd    | ce/gsl       |
| 71  | 65-74     | m   | others  | long-tube    |
| 65  | 65-74     | m   | poag    | filtering    |
| 72  | 65-74     | f   | pacd    | ce/gsl       |
| 68  | 65-74     | f   | poag    | ce/gsl       |
| 67  | 65-74     | m   | poag    | gonio-bypass |
| 79  | 75-89     | f   | others  | gonio-bypass |
| 58  | -64       | m   | poag    | gonio-bypass |
| 76  | 75-89     | m   | pacd    | gonio-bypass |
| 28  | -64       | m   | develop | long-tube    |
| 52  | -64       | m   | poag    | gonio-bypass |
| 76  | 75-89     | m   | pacd    | gonio-bypass |
| 64  | -64       | m   | poag    | gonio-bypass |
| 72  | 65-74     | f   | pacd    | ce/gsl       |
| 78  | 75-89     | m   | poag    | filtering    |
| 61  | -64       | m   | others  | filtering    |
| 64  | -64       | f   | pacd    | gonio-bypass |
| 78  | 75-89     | m   | pacd    | gonio-bypass |

|    |       |   |        |              |
|----|-------|---|--------|--------------|
| 94 | 90-   | f | pacd   | others       |
| 72 | 65-74 | m | poag   | gonio-bypass |
| 64 | -64   | f | pacd   | gonio-bypass |
| 86 | 75-89 | m | poag   | gonio-bypass |
| 85 | 75-89 | m | poag   | gonio-bypass |
| 74 | 65-74 | f | others | gonio-bypass |
| 67 | 65-74 | m | pacd   | filtering    |
| 53 | -64   | m | poag   | filtering    |
| 85 | 75-89 | m | poag   | gonio-bypass |
| 57 | -64   | f | poag   | filtering    |
| 78 | 75-89 | m | pacd   | gonio-bypass |
| 67 | 65-74 | f | poag   | ce/gsl       |
| 70 | 65-74 | m | poag   | filtering    |
| 86 | 75-89 | f | exg    | filtering    |
| 86 | 75-89 | f | pacd   | gonio-bypass |
| 67 | 65-74 | f | pacd   | ce/gsl       |
| 65 | 65-74 | f | others | filtering    |
| 65 | 65-74 | f | others | filtering    |
| 86 | 75-89 | m | poag   | gonio-bypass |
| 85 | 75-89 | f | poag   | gonio-bypass |
| 53 | -64   | m | poag   | long-tube    |
| 5  | -64   | f | others | long-tube    |
| 71 | 65-74 | m | poag   | gonio-bypass |
| 79 | 75-89 | f | others | gonio-bypass |
| 68 | 65-74 | m | others | long-tube    |
| 63 | -64   | m | poag   | filtering    |
| 71 | 65-74 | m | poag   | gonio-bypass |
| 84 | 75-89 | f | poag   | filtering    |
| 81 | 75-89 | m | pacd   | gonio-bypass |
| 63 | -64   | m | poag   | filtering    |
| 84 | 75-89 | f | exg    | gonio-bypass |
| 90 | 90-   | f | poag   | gonio-bypass |
| 74 | 65-74 | f | poag   | filtering    |
| 42 | -64   | m | poag   | filtering    |
| 59 | -64   | f | poag   | gonio-bypass |
| 84 | 75-89 | f | exg    | filtering    |
| 90 | 90-   | f | poag   | gonio-bypass |
| 63 | -64   | m | poag   | gonio-bypass |
| 85 | 75-89 | f | poag   | gonio-bypass |
| 78 | 75-89 | f | pacd   | gonio-bypass |

|    |       |   |         |              |
|----|-------|---|---------|--------------|
| 72 | 65-74 | f | poag    | ce/gsl       |
| 63 | -64   | f | poag    | filtering    |
| 22 | -64   | f | develop | long-tube    |
| 78 | 75-89 | f | pacd    | gonio-bypass |
| 82 | 75-89 | f | pacd    | ce/gsl       |
| 63 | -64   | f | poag    | filtering    |
| 85 | 75-89 | m | pacd    | ce/gsl       |
| 71 | 65-74 | f | poag    | gonio-bypass |
| 79 | 75-89 | f | poag    | gonio-bypass |
| 75 | 75-89 | f | pacd    | ce/gsl       |
| 70 | 65-74 | f | pacd    | ce/gsl       |
| 71 | 65-74 | f | poag    | gonio-bypass |
| 61 | -64   | m | exg     | gonio-bypass |
| 79 | 75-89 | f | poag    | gonio-bypass |
| 83 | 75-89 | f | poag    | ce/gsl       |
| 74 | 65-74 | f | poag    | others       |
| 70 | 65-74 | f | pacd    | ce/gsl       |
| 86 | 75-89 | m | exg     | gonio-bypass |
| 82 | 75-89 | m | poag    | others       |
| 83 | 75-89 | f | pacd    | ce/gsl       |
| 83 | 75-89 | m | exg     | gonio-bypass |
| 74 | 65-74 | f | poag    | gonio-bypass |
| 66 | 65-74 | m | poag    | filtering    |
| 69 | 65-74 | f | poag    | ce/gsl       |
| 82 | 75-89 | m | poag    | gonio-bypass |
| 83 | 75-89 | m | poag    | gonio-bypass |
| 39 | -64   | m | pacd    | ce/gsl       |
| 52 | -64   | m | others  | long-tube    |
| 82 | 75-89 | m | poag    | others       |
| 79 | 75-89 | f | pacd    | filtering    |
| 80 | 75-89 | f | poag    | gonio-bypass |
| 74 | 65-74 | m | poag    | gonio-bypass |
| 70 | 65-74 | f | exg     | gonio-bypass |
| 83 | 75-89 | m | others  | others       |
| 62 | -64   | m | poag    | gonio-bypass |
| 80 | 75-89 | f | poag    | gonio-bypass |
| 79 | 75-89 | f | others  | filtering    |
| 74 | 65-74 | m | poag    | gonio-bypass |
| 95 | 90-   | f | exg     | filtering    |
| 65 | 65-74 | f | poag    | gonio-bypass |

|    |       |   |        |              |
|----|-------|---|--------|--------------|
| 78 | 75-89 | f | poag   | gonio-bypass |
| 57 | -64   | m | poag   | filtering    |
| 84 | 75-89 | f | pacd   | filtering    |
| 58 | -64   | f | poag   | gonio-bypass |
| 78 | 75-89 | f | poag   | gonio-bypass |
| 80 | 75-89 | m | exg    | gonio-bypass |
| 81 | 75-89 | m | poag   | gonio-bypass |
| 61 | -64   | m | poag   | filtering    |
| 80 | 75-89 | m | poag   | gonio-bypass |
| 60 | -64   | f | poag   | gonio-bypass |
| 84 | 75-89 | m | others | long-tube    |
| 66 | 65-74 | m | poag   | gonio-bypass |
| 82 | 75-89 | m | poag   | gonio-bypass |
| 66 | 65-74 | m | poag   | gonio-bypass |
| 67 | 65-74 | f | pacd   | ce/gsl       |
| 82 | 75-89 | m | exg    | long-tube    |
| 66 | 65-74 | m | poag   | gonio-bypass |
| 72 | 65-74 | f | pacd   | gonio-bypass |
| 67 | 65-74 | f | pacd   | ce/gsl       |
| 71 | 65-74 | f | exg    | filtering    |
| 35 | -64   | f | others | long-tube    |
| 64 | -64   | m | poag   | filtering    |
| 80 | 75-89 | m | pacd   | gonio-bypass |
| 62 | -64   | m | others | gonio-bypass |
| 54 | -64   | f | pacd   | ce/gsl       |
| 30 | -64   | m | others | long-tube    |
| 80 | 75-89 | m | pacd   | ce/gsl       |
| 84 | 75-89 | f | pacd   | ce/gsl       |
| 84 | 75-89 | m | pacd   | long-tube    |
| 60 | -64   | m | poag   | filtering    |
| 61 | -64   | f | others | long-tube    |
| 70 | 65-74 | f | poag   | others       |
| 71 | 65-74 | m | exg    | others       |
| 64 | -64   | m | poag   | filtering    |
| 65 | 65-74 | m | poag   | filtering    |
| 83 | 75-89 | m | poag   | gonio-bypass |
| 84 | 75-89 | f | pacd   | ce/gsl       |
| 65 | 65-74 | f | poag   | gonio-bypass |
| 40 | -64   | m | pacd   | ce/gsl       |
| 88 | 75-89 | f | pacd   | filtering    |

|    |       |   |         |              |
|----|-------|---|---------|--------------|
| 70 | 65-74 | f | poag    | gonio-bypass |
| 85 | 75-89 | m | others  | ce/gsl       |
| 72 | 65-74 | f | others  | filtering    |
| 72 | 65-74 | f | others  | filtering    |
| 82 | 75-89 | m | exg     | gonio-bypass |
| 73 | 65-74 | m | poag    | others       |
| 62 | -64   | m | poag    | gonio-bypass |
| 72 | 65-74 | f | poag    | gonio-bypass |
| 61 | -64   | f | exg     | others       |
| 86 | 75-89 | f | pacd    | others       |
| 86 | 75-89 | f | pacd    | ce/gsl       |
| 86 | 75-89 | f | pacd    | long-tube    |
| 57 | -64   | m | others  | gonio-bypass |
| 85 | 75-89 | m | others  | others       |
| 71 | 65-74 | f | poag    | filtering    |
| 62 | -64   | m | poag    | gonio-bypass |
| 80 | 75-89 | m | pacd    | gonio-bypass |
| 38 | -64   | m | develop | filtering    |
| 79 | 75-89 | m | exg     | others       |
| 87 | 75-89 | m | pacd    | ce/gsl       |
| 76 | 75-89 | f | poag    | others       |
| 68 | 65-74 | f | poag    | others       |
| 84 | 75-89 | m | exg     | gonio-bypass |
| 87 | 75-89 | m | pacd    | ce/gsl       |
| 79 | 75-89 | m | exg     | gonio-bypass |
| 84 | 75-89 | m | others  | others       |
| 70 | 65-74 | m | others  | others       |
| 11 | -64   | f | develop | long-tube    |
| 68 | 65-74 | f | poag    | filtering    |
| 78 | 75-89 | m | develop | gonio-bypass |
| 85 | 75-89 | f | exg     | gonio-bypass |
| 56 | -64   | m | poag    | gonio-bypass |
| 84 | 75-89 | f | poag    | gonio-bypass |
| 66 | 65-74 | m | others  | gonio-bypass |
| 61 | -64   | m | poag    | gonio-bypass |
| 84 | 75-89 | f | pacd    | gonio-bypass |
| 65 | 65-74 | m | exg     | gonio-bypass |
| 67 | 65-74 | m | poag    | gonio-bypass |
| 84 | 75-89 | f | poag    | gonio-bypass |
| 70 | 65-74 | m | poag    | long-tube    |

|    |       |   |         |              |
|----|-------|---|---------|--------------|
| 11 | -64   | f | develop | long-tube    |
| 84 | 75-89 | f | poag    | gonio-bypass |
| 85 | 75-89 | f | poag    | gonio-bypass |
| 70 | 65-74 | m | others  | others       |
| 72 | 65-74 | f | poag    | filtering    |
| 49 | -64   | m | others  | filtering    |
| 85 | 75-89 | f | poag    | gonio-bypass |
| 82 | 75-89 | f | pacd    | long-tube    |
| 77 | 75-89 | m | poag    | gonio-bypass |
| 59 | -64   | f | poag    | filtering    |
| 60 | -64   | f | poag    | ce/gsl       |
| 73 | 65-74 | f | poag    | gonio-bypass |
| 84 | 75-89 | f | poag    | others       |
| 78 | 75-89 | f | exg     | long-tube    |
| 64 | -64   | m | poag    | filtering    |
| 73 | 65-74 | f | poag    | gonio-bypass |
| 84 | 75-89 | f | pacd    | gonio-bypass |
| 81 | 75-89 | f | exg     | gonio-bypass |
| 70 | 65-74 | m | others  | long-tube    |
| 56 | -64   | m | poag    | long-tube    |
| 83 | 75-89 | m | poag    | gonio-bypass |
| 75 | 75-89 | f | exg     | gonio-bypass |
| 68 | 65-74 | f | poag    | gonio-bypass |
| 81 | 75-89 | f | pacd    | gonio-bypass |
| 61 | -64   | m | poag    | filtering    |
| 66 | 65-74 | m | others  | gonio-bypass |
| 77 | 75-89 | m | others  | gonio-bypass |
| 84 | 75-89 | f | poag    | gonio-bypass |
| 88 | 75-89 | m | poag    | filtering    |
| 72 | 65-74 | f | pacd    | ce/gsl       |
| 77 | 75-89 | m | others  | gonio-bypass |
| 81 | 75-89 | f | pacd    | gonio-bypass |
| 70 | 65-74 | m | exg     | others       |
| 77 | 75-89 | f | pacd    | ce/gsl       |
| 81 | 75-89 | m | others  | long-tube    |
| 62 | -64   | f | pacd    | filtering    |
| 75 | 75-89 | f | pacd    | gonio-bypass |
| 83 | 75-89 | f | poag    | gonio-bypass |
| 66 | 65-74 | f | poag    | others       |
| 77 | 75-89 | f | pacd    | ce/gsl       |

|    |       |   |         |              |
|----|-------|---|---------|--------------|
| 62 | -64   | m | others  | filtering    |
| 75 | 75-89 | f | pacd    | gonio-bypass |
| 83 | 75-89 | f | poag    | gonio-bypass |
| 64 | -64   | f | pacd    | ce/gsl       |
| 54 | -64   | m | poag    | filtering    |
| 57 | -64   | m | others  | filtering    |
| 81 | 75-89 | f | poag    | gonio-bypass |
| 83 | 75-89 | f | exg     | long-tube    |
| 80 | 75-89 | f | exg     | gonio-bypass |
| 83 | 75-89 | f | exg     | long-tube    |
| 77 | 75-89 | f | pacd    | filtering    |
| 81 | 75-89 | f | poag    | gonio-bypass |
| 79 | 75-89 | m | exg     | gonio-bypass |
| 71 | 65-74 | m | others  | long-tube    |
| 56 | -64   | f | poag    | filtering    |
| 75 | 75-89 | f | poag    | gonio-bypass |
| 81 | 75-89 | m | exg     | filtering    |
| 55 | -64   | f | poag    | filtering    |
| 77 | 75-89 | f | pacd    | filtering    |
| 86 | 75-89 | f | poag    | gonio-bypass |
| 80 | 75-89 | f | poag    | gonio-bypass |
| 78 | 75-89 | m | others  | filtering    |
| 75 | 75-89 | m | others  | others       |
| 75 | 75-89 | f | poag    | gonio-bypass |
| 81 | 75-89 | m | exg     | filtering    |
| 76 | 75-89 | f | poag    | filtering    |
| 86 | 75-89 | f | pacd    | gonio-bypass |
| 76 | 75-89 | f | poag    | gonio-bypass |
| 84 | 75-89 | m | poag    | gonio-bypass |
| 71 | 65-74 | m | exg     | gonio-bypass |
| 71 | 65-74 | m | exg     | gonio-bypass |
| 59 | -64   | m | poag    | filtering    |
| 44 | -64   | m | exg     | filtering    |
| 78 | 75-89 | m | others  | filtering    |
| 19 | -64   | f | others  | long-tube    |
| 71 | 65-74 | f | exg     | gonio-bypass |
| 77 | 75-89 | m | exg     | gonio-bypass |
| 71 | 65-74 | m | exg     | gonio-bypass |
| 54 | -64   | m | develop | filtering    |
| 81 | 75-89 | m | exg     | long-tube    |

|    |       |   |         |              |
|----|-------|---|---------|--------------|
| 37 | -64   | m | develop | long-tube    |
| 81 | 75-89 | m | exg     | others       |
| 83 | 75-89 | m | exg     | gonio-bypass |
| 88 | 75-89 | f | pacd    | ce/gsl       |
| 77 | 75-89 | f | poag    | gonio-bypass |
| 81 | 75-89 | f | poag    | gonio-bypass |
| 64 | -64   | m | poag    | gonio-bypass |
| 88 | 75-89 | f | pacd    | ce/gsl       |
| 31 | -64   | m | others  | long-tube    |
| 54 | -64   | f | poag    | filtering    |
| 64 | -64   | m | others  | others       |
| 59 | -64   | m | poag    | long-tube    |
| 37 | -64   | m | develop | long-tube    |
| 75 | 75-89 | m | poag    | gonio-bypass |
| 64 | -64   | m | poag    | gonio-bypass |
| 62 | -64   | m | poag    | gonio-bypass |
| 37 | -64   | m | develop | long-tube    |
| 34 | -64   | m | develop | long-tube    |
| 70 | 65-74 | m | poag    | filtering    |
| 60 | -64   | f | poag    | filtering    |
| 64 | -64   | m | poag    | others       |
| 54 | -64   | f | poag    | filtering    |
| 72 | 65-74 | m | poag    | gonio-bypass |
| 71 | 65-74 | f | pacd    | ce/gsl       |
| 71 | 65-74 | f | pacd    | ce/gsl       |
| 62 | -64   | m | others  | filtering    |
| 61 | -64   | m | poag    | long-tube    |
| 75 | 75-89 | f | pacd    | ce/gsl       |
| 72 | 65-74 | m | poag    | gonio-bypass |
| 61 | -64   | m | poag    | others       |
| 64 | -64   | f | pacd    | ce/gsl       |
| 62 | -64   | m | others  | others       |
| 82 | 75-89 | f | pacd    | ce/gsl       |
| 59 | -64   | m | others  | filtering    |
| 59 | -64   | f | others  | filtering    |
| 70 | 65-74 | f | poag    | gonio-bypass |
| 75 | 75-89 | m | exg     | gonio-bypass |
| 82 | 75-89 | f | pacd    | ce/gsl       |
| 70 | 65-74 | m | poag    | gonio-bypass |
| 49 | -64   | f | poag    | filtering    |



|    |       |   |        |              |
|----|-------|---|--------|--------------|
| 69 | 65-74 | m | exg    | filtering    |
| 74 | 65-74 | m | others | filtering    |
| 70 | 65-74 | m | others | long-tube    |
| 75 | 75-89 | m | exg    | gonio-bypass |
| 54 | -64   | f | poag   | filtering    |
| 19 | -64   | f | others | long-tube    |
| 50 | -64   | m | poag   | filtering    |
| 84 | 75-89 | m | exg    | gonio-bypass |
| 70 | 65-74 | f | exg    | long-tube    |
| 60 | -64   | m | others | long-tube    |
| 81 | 75-89 | f | poag   | gonio-bypass |
| 79 | 75-89 | f | pacd   | gonio-bypass |
| 86 | 75-89 | f | poag   | gonio-bypass |
| 73 | 65-74 | m | exg    | gonio-bypass |
| 67 | 65-74 | f | exg    | gonio-bypass |
| 0  | -64   | f | poag   | long-tube    |
| 84 | 75-89 | m | exg    | others       |
| 54 | -64   | f | poag   | filtering    |
| 44 | -64   | m | exg    | long-tube    |
| 78 | 75-89 | m | others | others       |
| 78 | 75-89 | f | exg    | filtering    |
| 66 | 65-74 | m | pacd   | gonio-bypass |
| 79 | 75-89 | f | pacd   | gonio-bypass |
| 86 | 75-89 | f | poag   | gonio-bypass |
| 73 | 65-74 | m | exg    | gonio-bypass |
| 67 | 65-74 | f | exg    | gonio-bypass |
| 65 | 65-74 | f | pacd   | gonio-bypass |
| 80 | 75-89 | f | poag   | others       |
| 78 | 75-89 | f | exg    | filtering    |
| 60 | -64   | f | poag   | filtering    |
| 62 | -64   | m | poag   | gonio-bypass |
| 66 | 65-74 | m | poag   | gonio-bypass |
| 62 | -64   | f | others | long-tube    |
| 20 | -64   | m | others | gonio-bypass |
| 80 | 75-89 | f | poag   | long-tube    |
| 0  | -64   | f | others | others       |
| 59 | -64   | f | poag   | filtering    |
| 62 | -64   | f | exg    | others       |
| 50 | -64   | m | exg    | gonio-bypass |
| 70 | 65-74 | f | pacd   | filtering    |

|    |       |   |         |              |
|----|-------|---|---------|--------------|
| 65 | 65-74 | f | exg     | long-tube    |
| 75 | 75-89 | m | poag    | long-tube    |
| 50 | -64   | m | poag    | filtering    |
| 4  | -64   | m | develop | long-tube    |
| 71 | 65-74 | f | pacd    | ce/gsl       |
| 80 | 75-89 | f | pacd    | ce/gsl       |
| 88 | 75-89 | m | poag    | gonio-bypass |
| 56 | -64   | m | poag    | long-tube    |
| 88 | 75-89 | m | exg     | long-tube    |
| 50 | -64   | m | exg     | gonio-bypass |
| 79 | 75-89 | m | others  | filtering    |
| 88 | 75-89 | m | poag    | gonio-bypass |
| 75 | 75-89 | f | poag    | gonio-bypass |
| 88 | 75-89 | m | exg     | long-tube    |
| 86 | 75-89 | m | exg     | long-tube    |
| 65 | 65-74 | f | others  | long-tube    |
| 86 | 75-89 | f | poag    | gonio-bypass |
| 75 | 75-89 | f | exg     | gonio-bypass |
| 54 | -64   | m | develop | filtering    |
| 19 | -64   | f | others  | gonio-bypass |
| 61 | -64   | f | others  | long-tube    |
| 73 | 65-74 | m | poag    | filtering    |
| 75 | 75-89 | f | poag    | gonio-bypass |
| 70 | 65-74 | m | poag    | gonio-bypass |
| 75 | 75-89 | f | poag    | filtering    |
| 68 | 65-74 | f | poag    | filtering    |
| 86 | 75-89 | f | pacd    | gonio-bypass |
| 80 | 75-89 | f | pacd    | ce/gsl       |
| 68 | 65-74 | f | poag    | filtering    |
| 61 | -64   | m | pacd    | ce/gsl       |
| 78 | 75-89 | f | pacd    | gonio-bypass |
| 92 | 90-   | f | exg     | long-tube    |
| 43 | -64   | m | poag    | filtering    |
| 86 | 75-89 | f | pacd    | ce/gsl       |
| 61 | -64   | m | pacd    | ce/gsl       |
| 77 | 75-89 | m | poag    | gonio-bypass |
| 69 | 65-74 | m | poag    | gonio-bypass |
| 72 | 65-74 | m | pacd    | ce/gsl       |
| 63 | -64   | f | others  | gonio-bypass |
| 37 | -64   | f | others  | gonio-bypass |

|    |       |   |        |              |
|----|-------|---|--------|--------------|
| 72 | 65-74 | m | pacd   | ce/gsl       |
| 86 | 75-89 | f | pacd   | ce/gsl       |
| 77 | 75-89 | m | poag   | gonio-bypass |
| 75 | 75-89 | m | exg    | gonio-bypass |
| 58 | -64   | f | pacd   | ce/gsl       |
| 63 | -64   | f | others | gonio-bypass |
| 66 | 65-74 | m | poag   | others       |
| 84 | 75-89 | f | poag   | gonio-bypass |
| 66 | 65-74 | m | poag   | filtering    |
| 62 | -64   | m | exg    | filtering    |
| 58 | -64   | f | pacd   | ce/gsl       |
| 69 | 65-74 | m | others | long-tube    |
| 84 | 75-89 | f | others | others       |
| 84 | 75-89 | m | poag   | gonio-bypass |
| 82 | 75-89 | f | pacd   | ce/gsl       |
| 86 | 75-89 | m | exg    | gonio-bypass |
| 62 | -64   | m | exg    | long-tube    |
| 80 | 75-89 | m | pacd   | long-tube    |
| 84 | 75-89 | f | others | others       |
| 84 | 75-89 | f | poag   | long-tube    |
| 83 | 75-89 | f | pacd   | gonio-bypass |
| 19 | -64   | f | others | gonio-bypass |
| 69 | 65-74 | m | poag   | filtering    |
| 64 | -64   | f | poag   | gonio-bypass |
| 71 | 65-74 | f | poag   | others       |
| 82 | 75-89 | f | pacd   | ce/gsl       |
| 86 | 75-89 | m | poag   | ce/gsl       |
| 74 | 65-74 | f | exg    | long-tube    |
| 37 | -64   | f | others | filtering    |
| 83 | 75-89 | f | pacd   | gonio-bypass |
| 73 | 65-74 | f | poag   | filtering    |
| 69 | 65-74 | m | poag   | filtering    |
| 79 | 75-89 | m | exg    | gonio-bypass |
| 63 | -64   | m | poag   | gonio-bypass |
| 79 | 75-89 | f | pacd   | ce/gsl       |
| 37 | -64   | f | others | others       |
| 62 | -64   | f | poag   | filtering    |
| 87 | 75-89 | f | exg    | gonio-bypass |
| 78 | 75-89 | f | poag   | gonio-bypass |
| 63 | -64   | m | exg    | gonio-bypass |

|    |       |   |         |              |
|----|-------|---|---------|--------------|
| 58 | -64   | m | poag    | gonio-bypass |
| 79 | 75-89 | f | pacd    | ce/gsl       |
| 73 | 65-74 | m | poag    | filtering    |
| 71 | 65-74 | f | others  | filtering    |
| 81 | 75-89 | f | others  | filtering    |
| 87 | 75-89 | f | exg     | gonio-bypass |
| 63 | -64   | m | poag    | gonio-bypass |
| 58 | -64   | m | poag    | gonio-bypass |
| 63 | -64   | m | exg     | gonio-bypass |
| 60 | -64   | m | poag    | gonio-bypass |
| 62 | -64   | f | exg     | others       |
| 65 | 65-74 | f | poag    | gonio-bypass |
| 86 | 75-89 | f | exg     | long-tube    |
| 82 | 75-89 | m | exg     | long-tube    |
| 65 | 65-74 | f | exg     | long-tube    |
| 82 | 75-89 | m | exg     | long-tube    |
| 93 | 90-   | m | exg     | long-tube    |
| 57 | -64   | m | poag    | filtering    |
| 76 | 75-89 | m | poag    | filtering    |
| 52 | -64   | f | poag    | filtering    |
| 59 | -64   | f | exg     | long-tube    |
| 67 | 65-74 | f | poag    | filtering    |
| 52 | -64   | m | poag    | long-tube    |
| 62 | -64   | f | poag    | gonio-bypass |
| 62 | -64   | m | poag    | gonio-bypass |
| 82 | 75-89 | f | others  | others       |
| 62 | -64   | m | others  | others       |
| 62 | -64   | m | others  | others       |
| 52 | -64   | m | poag    | long-tube    |
| 62 | -64   | f | poag    | gonio-bypass |
| 63 | -64   | f | pacd    | ce/gsl       |
| 76 | 75-89 | f | pacd    | ce/gsl       |
| 8  | -64   | f | develop | long-tube    |
| 74 | 65-74 | m | poag    | gonio-bypass |
| 56 | -64   | m | poag    | filtering    |
| 74 | 65-74 | m | exg     | filtering    |
| 76 | 75-89 | f | pacd    | ce/gsl       |
| 67 | 65-74 | m | poag    | long-tube    |
| 81 | 75-89 | f | pacd    | gonio-bypass |
| 87 | 75-89 | m | others  | others       |

|    |       |   |        |              |
|----|-------|---|--------|--------------|
| 74 | 65-74 | m | poag   | gonio-bypass |
| 74 | 65-74 | m | exg    | filtering    |
| 64 | -64   | f | poag   | long-tube    |
| 84 | 75-89 | f | pacd   | ce/gsl       |
| 85 | 75-89 | m | pacd   | others       |
| 81 | 75-89 | f | pacd   | gonio-bypass |
| 72 | 65-74 | m | poag   | long-tube    |
| 64 | -64   | f | poag   | long-tube    |
| 87 | 75-89 | m | poag   | gonio-bypass |
| 84 | 75-89 | f | pacd   | ce/gsl       |
| 78 | 75-89 | f | poag   | gonio-bypass |
| 87 | 75-89 | m | others | others       |
| 66 | 65-74 | m | exg    | filtering    |
| 72 | 65-74 | m | poag   | long-tube    |
| 82 | 75-89 | f | poag   | gonio-bypass |
| 78 | 75-89 | f | poag   | gonio-bypass |
| 65 | 65-74 | m | poag   | filtering    |
| 64 | -64   | f | pacd   | ce/gsl       |
| 85 | 75-89 | f | pacd   | ce/gsl       |
| 78 | 75-89 | f | poag   | gonio-bypass |
| 85 | 75-89 | m | exg    | gonio-bypass |
| 0  | -64   | f | poag   | filtering    |
| 81 | 75-89 | f | others | filtering    |
| 91 | 90-   | f | others | long-tube    |
| 78 | 75-89 | m | exg    | gonio-bypass |
| 67 | 65-74 | f | poag   | gonio-bypass |
| 94 | 90-   | m | exg    | long-tube    |
| 64 | -64   | f | pacd   | ce/gsl       |
| 87 | 75-89 | f | pacd   | ce/gsl       |
| 87 | 75-89 | f | pacd   | ce/gsl       |
| 81 | 75-89 | f | poag   | gonio-bypass |
| 74 | 65-74 | m | poag   | gonio-bypass |
| 67 | 65-74 | m | poag   | gonio-bypass |
| 46 | -64   | f | poag   | gonio-bypass |
| 76 | 75-89 | f | pacd   | others       |
| 81 | 75-89 | f | others | others       |
| 47 | -64   | m | others | others       |
| 78 | 75-89 | m | exg    | long-tube    |
| 74 | 65-74 | m | pacd   | ce/gsl       |
| 74 | 65-74 | f | poag   | gonio-bypass |

|    |       |   |         |              |
|----|-------|---|---------|--------------|
| 84 | 75-89 | m | others  | others       |
| 68 | 65-74 | m | others  | filtering    |
| 53 | -64   | m | others  | filtering    |
| 74 | 65-74 | f | poag    | gonio-bypass |
| 78 | 75-89 | f | exg     | gonio-bypass |
| 82 | 75-89 | f | pacd    | others       |
| 82 | 75-89 | f | pacd    | gonio-bypass |
| 71 | 65-74 | f | others  | gonio-bypass |
| 61 | -64   | f | poag    | filtering    |
| 77 | 75-89 | m | exg     | gonio-bypass |
| 82 | 75-89 | f | pacd    | others       |
| 86 | 75-89 | m | others  | ce/gsl       |
| 82 | 75-89 | f | others  | others       |
| 83 | 75-89 | f | exg     | filtering    |
| 82 | 75-89 | f | pacd    | gonio-bypass |
| 77 | 75-89 | f | pacd    | ce/gsl       |
| 77 | 75-89 | m | exg     | gonio-bypass |
| 67 | 65-74 | f | others  | long-tube    |
| 59 | -64   | m | others  | long-tube    |
| 77 | 75-89 | f | pacd    | ce/gsl       |
| 71 | 65-74 | f | poag    | gonio-bypass |
| 76 | 75-89 | m | others  | long-tube    |
| 72 | 65-74 | f | poag    | others       |
| 54 | -64   | f | poag    | filtering    |
| 33 | -64   | f | develop | long-tube    |
| 58 | -64   | m | poag    | filtering    |
| 75 | 75-89 | f | poag    | filtering    |
| 59 | -64   | m | poag    | filtering    |
| 71 | 65-74 | f | pacd    | ce/gsl       |
| 74 | 65-74 | m | poag    | gonio-bypass |
| 80 | 75-89 | f | pacd    | gonio-bypass |
| 76 | 75-89 | f | pacd    | gonio-bypass |
| 71 | 65-74 | f | pacd    | ce/gsl       |
| 55 | -64   | m | poag    | gonio-bypass |
| 82 | 75-89 | f | poag    | gonio-bypass |
| 79 | 75-89 | m | others  | filtering    |
| 73 | 65-74 | m | poag    | filtering    |
| 80 | 75-89 | f | pacd    | gonio-bypass |
| 76 | 75-89 | f | pacd    | gonio-bypass |
| 78 | 75-89 | m | exg     | gonio-bypass |

|    |       |   |        |              |
|----|-------|---|--------|--------------|
| 79 | 75-89 | f | pacd   | long-tube    |
| 82 | 75-89 | f | poag   | gonio-bypass |
| 86 | 75-89 | m | others | others       |
| 87 | 75-89 | f | pacd   | ce/gsl       |
| 85 | 75-89 | f | pacd   | ce/gsl       |
| 75 | 75-89 | m | others | long-tube    |
| 74 | 65-74 | m | exg    | long-tube    |
| 84 | 75-89 | f | exg    | gonio-bypass |
| 85 | 75-89 | m | poag   | filtering    |
| 87 | 75-89 | f | pacd   | ce/gsl       |
| 63 | -64   | m | others | others       |
| 85 | 75-89 | f | pacd   | ce/gsl       |
| 87 | 75-89 | m | pacd   | gonio-bypass |
| 87 | 75-89 | m | others | others       |
| 85 | 75-89 | m | poag   | filtering    |
| 84 | 75-89 | f | poag   | gonio-bypass |
| 81 | 75-89 | m | exg    | long-tube    |
| 87 | 75-89 | m | others | long-tube    |
| 81 | 75-89 | m | exg    | gonio-bypass |
| 65 | 65-74 | m | poag   | gonio-bypass |
| 87 | 75-89 | m | pacd   | long-tube    |
| 74 | 65-74 | m | others | others       |
| 81 | 75-89 | m | others | others       |
| 82 | 75-89 | m | others | others       |
| 68 | 65-74 | f | poag   | gonio-bypass |
| 65 | 65-74 | m | poag   | gonio-bypass |
| 87 | 75-89 | m | pacd   | long-tube    |
| 20 | -64   | f | others | long-tube    |
| 76 | 75-89 | m | poag   | long-tube    |
| 54 | -64   | m | poag   | filtering    |
| 81 | 75-89 | f | pacd   | gonio-bypass |
| 79 | 75-89 | f | pacd   | gonio-bypass |
| 63 | -64   | m | others | long-tube    |
| 81 | 75-89 | f | poag   | gonio-bypass |
| 79 | 75-89 | f | pacd   | gonio-bypass |
| 68 | 65-74 | f | pacd   | ce/gsl       |
| 61 | -64   | m | poag   | filtering    |
| 64 | -64   | m | exg    | gonio-bypass |
| 83 | 75-89 | m | exg    | long-tube    |
| 40 | -64   | m | others | others       |

|    |       |   |         |              |
|----|-------|---|---------|--------------|
| 20 | -64   | f | others  | others       |
| 65 | 65-74 | f | poag    | gonio-bypass |
| 61 | -64   | m | poag    | gonio-bypass |
| 82 | 75-89 | f | poag    | gonio-bypass |
| 74 | 65-74 | f | poag    | filtering    |
| 72 | 65-74 | f | pacd    | ce/gsl       |
| 88 | 75-89 | f | poag    | gonio-bypass |
| 0  | -64   | f | develop | long-tube    |
| 72 | 65-74 | f | pacd    | ce/gsl       |
| 84 | 75-89 | m | exg     | gonio-bypass |
| 54 | -64   | f | others  | filtering    |
| 80 | 75-89 | f | exg     | long-tube    |
| 74 | 65-74 | f | poag    | long-tube    |
| 58 | -64   | m | others  | others       |
| 83 | 75-89 | f | pacd    | gonio-bypass |
| 93 | 90-   | f | pacd    | ce/gsl       |
| 66 | 65-74 | f | exg     | gonio-bypass |
| 86 | 75-89 | m | others  | ce/gsl       |
| 78 | 75-89 | f | exg     | long-tube    |
| 86 | 75-89 | m | others  | long-tube    |
| 65 | 65-74 | f | others  | others       |
| 83 | 75-89 | f | pacd    | ce/gsl       |
| 81 | 75-89 | m | poag    | gonio-bypass |
| 93 | 90-   | f | pacd    | ce/gsl       |
| 68 | 65-74 | f | pacd    | ce/gsl       |
| 80 | 75-89 | f | pacd    | gonio-bypass |
| 80 | 75-89 | f | others  | others       |
| 58 | -64   | m | others  | long-tube    |
| 81 | 75-89 | m | poag    | gonio-bypass |
| 68 | 65-74 | m | exg     | filtering    |
| 80 | 75-89 | f | poag    | gonio-bypass |
| 62 | -64   | m | exg     | long-tube    |
| 76 | 75-89 | f | others  | gonio-bypass |
| 65 | 65-74 | m | others  | others       |
| 64 | -64   | f | others  | filtering    |
| 74 | 65-74 | f | pacd    | gonio-bypass |
| 33 | -64   | m | poag    | gonio-bypass |
| 87 | 75-89 | m | poag    | long-tube    |
| 68 | 65-74 | f | poag    | long-tube    |
| 97 | 90-   | m | pacd    | ce/gsl       |



|    |       |   |         |              |
|----|-------|---|---------|--------------|
| 40 | -64   | m | others  | long-tube    |
| 66 | 65-74 | m | poag    | gonio-bypass |
| 55 | -64   | f | poag    | filtering    |
| 87 | 75-89 | m | poag    | long-tube    |
| 59 | -64   | m | poag    | filtering    |
| 86 | 75-89 | f | exg     | gonio-bypass |
| 61 | -64   | m | poag    | filtering    |
| 86 | 75-89 | f | pacd    | long-tube    |
| 55 | -64   | m | poag    | filtering    |
| 72 | 65-74 | f | exg     | long-tube    |
| 72 | 65-74 | f | exg     | long-tube    |
| 44 | -64   | f | others  | gonio-bypass |
| 82 | 75-89 | m | poag    | gonio-bypass |
| 83 | 75-89 | f | exg     | gonio-bypass |
| 75 | 75-89 | m | exg     | long-tube    |
| 69 | 65-74 | f | poag    | gonio-bypass |
| 65 | 65-74 | f | develop | long-tube    |
| 40 | -64   | m | others  | others       |
| 83 | 75-89 | f | exg     | gonio-bypass |
| 82 | 75-89 | m | poag    | gonio-bypass |
| 75 | 75-89 | m | exg     | long-tube    |
| 69 | 65-74 | f | poag    | gonio-bypass |
| 7  | -64   | f | others  | others       |
| 82 | 75-89 | m | poag    | gonio-bypass |
| 66 | 65-74 | m | exg     | filtering    |
| 74 | 65-74 | f | pacd    | gonio-bypass |
| 83 | 75-89 | f | poag    | ce/gsl       |
| 63 | -64   | m | poag    | filtering    |
| 67 | 65-74 | m | poag    | gonio-bypass |
| 83 | 75-89 | m | exg     | long-tube    |
| 67 | 65-74 | m | others  | others       |
| 85 | 75-89 | f | poag    | gonio-bypass |
| 70 | 65-74 | f | poag    | gonio-bypass |
| 77 | 75-89 | f | exg     | long-tube    |
| 67 | 65-74 | m | others  | others       |
| 85 | 75-89 | f | poag    | gonio-bypass |
| 70 | 65-74 | f | poag    | ce/gsl       |
| 77 | 75-89 | f | exg     | long-tube    |
| 82 | 75-89 | m | poag    | long-tube    |
| 45 | -64   | f | others  | gonio-bypass |

|    |       |   |         |              |
|----|-------|---|---------|--------------|
| 83 | 75-89 | m | poag    | gonio-bypass |
| 53 | -64   | m | poag    | filtering    |
| 42 | -64   | f | poag    | filtering    |
| 36 | -64   | f | poag    | filtering    |
| 82 | 75-89 | m | poag    | gonio-bypass |
| 83 | 75-89 | m | others  | long-tube    |
| 78 | 75-89 | f | exg     | gonio-bypass |
| 85 | 75-89 | f | pacd    | ce/gsl       |
| 87 | 75-89 | f | pacd    | long-tube    |
| 71 | 65-74 | m | others  | long-tube    |
| 73 | 65-74 | m | others  | others       |
| 86 | 75-89 | f | others  | others       |
| 83 | 75-89 | m | exg     | gonio-bypass |
| 64 | -64   | f | pacd    | ce/gsl       |
| 79 | 75-89 | m | poag    | long-tube    |
| 36 | -64   | f | poag    | filtering    |
| 67 | 65-74 | m | poag    | long-tube    |
| 64 | -64   | f | pacd    | ce/gsl       |
| 58 | -64   | m | poag    | filtering    |
| 75 | 75-89 | m | exg     | long-tube    |
| 40 | -64   | m | others  | others       |
| 78 | 75-89 | f | pacd    | long-tube    |
| 86 | 75-89 | m | exg     | gonio-bypass |
| 75 | 75-89 | f | poag    | gonio-bypass |
| 62 | -64   | m | poag    | gonio-bypass |
| 74 | 65-74 | f | poag    | long-tube    |
| 86 | 75-89 | m | others  | filtering    |
| 75 | 75-89 | f | poag    | gonio-bypass |
| 86 | 75-89 | f | pacd    | ce/gsl       |
| 49 | -64   | m | poag    | gonio-bypass |
| 51 | -64   | f | poag    | filtering    |
| 38 | -64   | m | poag    | gonio-bypass |
| 86 | 75-89 | f | pacd    | ce/gsl       |
| 84 | 75-89 | f | pacd    | gonio-bypass |
| 87 | 75-89 | f | poag    | long-tube    |
| 82 | 75-89 | f | others  | filtering    |
| 60 | -64   | m | others  | long-tube    |
| 60 | -64   | m | others  | long-tube    |
| 38 | -64   | m | develop | others       |
| 52 | -64   | m | others  | gonio-bypass |

|    |       |   |        |              |
|----|-------|---|--------|--------------|
| 79 | 75-89 | f | pacd   | ce/gsl       |
| 85 | 75-89 | m | exg    | gonio-bypass |
| 83 | 75-89 | f | pacd   | ce/gsl       |
| 78 | 75-89 | f | exg    | gonio-bypass |
| 62 | -64   | m | others | others       |
| 52 | -64   | m | others | gonio-bypass |
| 79 | 75-89 | f | exg    | long-tube    |
| 84 | 75-89 | m | poag   | gonio-bypass |
| 72 | 65-74 | f | exg    | long-tube    |
| 72 | 65-74 | f | poag   | gonio-bypass |
| 78 | 75-89 | f | pacd   | long-tube    |
| 79 | 75-89 | f | exg    | long-tube    |
| 85 | 75-89 | f | exg    | filtering    |
| 79 | 75-89 | f | pacd   | ce/gsl       |
| 79 | 75-89 | m | exg    | long-tube    |
| 52 | -64   | m | others | gonio-bypass |
| 72 | 65-74 | f | pacd   | gonio-bypass |
| 53 | -64   | m | poag   | long-tube    |
| 78 | 75-89 | m | others | long-tube    |
| 78 | 75-89 | m | exg    | long-tube    |
| 68 | 65-74 | m | poag   | filtering    |
| 73 | 65-74 | f | exg    | gonio-bypass |
| 73 | 65-74 | m | poag   | filtering    |
| 81 | 75-89 | f | poag   | gonio-bypass |
| 78 | 75-89 | m | poag   | long-tube    |
| 67 | 65-74 | f | poag   | gonio-bypass |
| 73 | 65-74 | f | pacd   | ce/gsl       |
| 84 | 75-89 | f | pacd   | gonio-bypass |
| 63 | -64   | f | poag   | filtering    |
| 65 | 65-74 | f | poag   | long-tube    |
| 63 | -64   | f | poag   | long-tube    |
| 75 | 75-89 | f | exg    | long-tube    |
| 90 | 90-   | m | others | long-tube    |
| 70 | 65-74 | f | poag   | long-tube    |
| 76 | 75-89 | m | pacd   | gonio-bypass |
| 90 | 90-   | m | others | long-tube    |
| 68 | 65-74 | m | poag   | long-tube    |
| 67 | 65-74 | f | poag   | gonio-bypass |
| 85 | 75-89 | m | exg    | long-tube    |
| 90 | 90-   | m | others | long-tube    |

|    |       |   |        |              |
|----|-------|---|--------|--------------|
| 89 | 75-89 | m | pacd   | ce/gsl       |
| 76 | 75-89 | m | pacd   | ce/gsl       |
| 73 | 65-74 | m | poag   | gonio-bypass |
| 64 | -64   | f | poag   | filtering    |
| 68 | 65-74 | m | others | others       |
| 68 | 65-74 | m | poag   | long-tube    |
| 63 | -64   | m | others | long-tube    |
| 84 | 75-89 | f | poag   | gonio-bypass |
| 74 | 65-74 | m | exg    | filtering    |
| 68 | 65-74 | m | poag   | long-tube    |
| 74 | 65-74 | m | others | long-tube    |
| 78 | 75-89 | m | pacd   | ce/gsl       |
| 63 | -64   | f | poag   | gonio-bypass |
| 75 | 75-89 | f | exg    | gonio-bypass |
| 59 | -64   | m | poag   | filtering    |
| 78 | 75-89 | m | pacd   | ce/gsl       |
| 63 | -64   | f | poag   | long-tube    |
| 70 | 65-74 | m | others | filtering    |
| 81 | 75-89 | f | others | gonio-bypass |
| 76 | 75-89 | m | exg    | gonio-bypass |
| 85 | 75-89 | m | exg    | long-tube    |
| 63 | -64   | f | poag   | gonio-bypass |
| 83 | 75-89 | f | poag   | long-tube    |
| 68 | 65-74 | m | poag   | gonio-bypass |
| 79 | 75-89 | m | poag   | filtering    |
| 75 | 75-89 | f | exg    | gonio-bypass |
| 81 | 75-89 | m | poag   | gonio-bypass |
| 43 | -64   | m | poag   | filtering    |
| 73 | 65-74 | m | exg    | filtering    |
| 79 | 75-89 | m | others | others       |
| 55 | -64   | m | poag   | filtering    |
| 73 | 65-74 | f | exg    | gonio-bypass |
| 78 | 75-89 | f | pacd   | ce/gsl       |
| 86 | 75-89 | m | pacd   | ce/gsl       |
| 85 | 75-89 | m | exg    | long-tube    |
| 71 | 65-74 | m | others | long-tube    |
| 73 | 65-74 | f | poag   | long-tube    |
| 83 | 75-89 | m | poag   | gonio-bypass |
| 66 | 65-74 | m | poag   | gonio-bypass |
| 88 | 75-89 | f | pacd   | ce/gsl       |

|    |       |   |         |              |
|----|-------|---|---------|--------------|
| 85 | 75-89 | m | poag    | gonio-bypass |
| 83 | 75-89 | m | exg     | gonio-bypass |
| 49 | -64   | m | poag    | gonio-bypass |
| 56 | -64   | f | poag    | filtering    |
| 62 | -64   | m | poag    | others       |
| 72 | 65-74 | m | others  | long-tube    |
| 82 | 75-89 | m | others  | long-tube    |
| 82 | 75-89 | f | poag    | gonio-bypass |
| 61 | -64   | m | poag    | filtering    |
| 53 | -64   | m | poag    | long-tube    |
| 85 | 75-89 | m | poag    | long-tube    |
| 74 | 65-74 | m | exg     | filtering    |
| 38 | -64   | f | others  | filtering    |
| 82 | 75-89 | f | poag    | gonio-bypass |
| 77 | 75-89 | f | others  | gonio-bypass |
| 80 | 75-89 | f | pacd    | ce/gsl       |
| 85 | 75-89 | m | poag    | long-tube    |
| 72 | 65-74 | f | others  | filtering    |
| 89 | 75-89 | m | pacd    | gonio-bypass |
| 80 | 75-89 | f | pacd    | ce/gsl       |
| 55 | -64   | f | poag    | long-tube    |
| 79 | 75-89 | m | exg     | long-tube    |
| 21 | -64   | m | develop | long-tube    |
| 66 | 65-74 | m | poag    | filtering    |
| 73 | 65-74 | m | poag    | long-tube    |
| 89 | 75-89 | m | pacd    | gonio-bypass |
| 70 | 65-74 | m | poag    | gonio-bypass |
| 67 | 65-74 | m | poag    | filtering    |
| 65 | 65-74 | f | poag    | filtering    |
| 82 | 75-89 | f | others  | long-tube    |
| 40 | -64   | m | poag    | gonio-bypass |
| 72 | 65-74 | m | poag    | long-tube    |
| 62 | -64   | m | poag    | gonio-bypass |
| 89 | 75-89 | m | exg     | long-tube    |
| 72 | 65-74 | f | poag    | others       |
| 58 | -64   | m | pacd    | long-tube    |
| 87 | 75-89 | f | exg     | long-tube    |
| 74 | 65-74 | m | others  | long-tube    |
| 73 | 65-74 | f | exg     | filtering    |
| 82 | 75-89 | f | pacd    | ce/gsl       |

|    |       |   |        |              |
|----|-------|---|--------|--------------|
| 74 | 65-74 | m | poag   | gonio-bypass |
| 75 | 75-89 | m | others | long-tube    |
| 92 | 90-   | f | pacd   | ce/gsl       |
| 80 | 75-89 | f | exg    | gonio-bypass |
| 74 | 65-74 | m | poag   | gonio-bypass |
| 52 | -64   | m | poag   | gonio-bypass |
| 87 | 75-89 | m | exg    | long-tube    |
| 74 | 65-74 | m | others | long-tube    |
| 81 | 75-89 | m | pacd   | gonio-bypass |
| 78 | 75-89 | m | exg    | filtering    |
| 85 | 75-89 | f | exg    | filtering    |
| 83 | 75-89 | m | others | long-tube    |
| 79 | 75-89 | m | others | long-tube    |
| 66 | 65-74 | m | poag   | long-tube    |
| 74 | 65-74 | m | pacd   | ce/gsl       |
| 84 | 75-89 | m | poag   | gonio-bypass |
| 81 | 75-89 | m | poag   | gonio-bypass |
| 71 | 65-74 | f | pacd   | gonio-bypass |
| 68 | 65-74 | f | poag   | gonio-bypass |
| 62 | -64   | f | others | long-tube    |
| 84 | 75-89 | m | poag   | gonio-bypass |
| 81 | 75-89 | m | poag   | gonio-bypass |
| 71 | 65-74 | f | pacd   | gonio-bypass |
| 71 | 65-74 | f | pacd   | filtering    |
| 85 | 75-89 | m | exg    | long-tube    |
| 80 | 75-89 | f | poag   | gonio-bypass |
| 68 | 65-74 | f | poag   | filtering    |
| 54 | -64   | m | poag   | filtering    |
| 89 | 75-89 | m | pacd   | ce/gsl       |
| 64 | -64   | m | poag   | filtering    |
| 65 | 65-74 | m | poag   | filtering    |
| 80 | 75-89 | f | exg    | long-tube    |
| 74 | 65-74 | m | poag   | long-tube    |
| 89 | 75-89 | m | pacd   | ce/gsl       |
| 72 | 65-74 | f | others | filtering    |
| 79 | 75-89 | f | poag   | gonio-bypass |
| 72 | 65-74 | m | poag   | gonio-bypass |
| 68 | 65-74 | m | poag   | long-tube    |
| 79 | 75-89 | m | others | long-tube    |
| 85 | 75-89 | f | exg    | filtering    |

|    |       |   |         |              |
|----|-------|---|---------|--------------|
| 79 | 75-89 | f | poag    | gonio-bypass |
| 72 | 65-74 | m | poag    | gonio-bypass |
| 41 | -64   | f | others  | others       |
| 21 | -64   | m | develop | long-tube    |
| 60 | -64   | f | others  | long-tube    |
| 51 | -64   | f | pacd    | others       |
| 83 | 75-89 | f | exg     | gonio-bypass |
| 54 | -64   | m | others  | gonio-bypass |
| 45 | -64   | f | poag    | gonio-bypass |
| 58 | -64   | m | poag    | filtering    |
| 75 | 75-89 | m | pacd    | long-tube    |
| 76 | 75-89 | f | poag    | long-tube    |
| 85 | 75-89 | f | others  | filtering    |
| 61 | -64   | f | poag    | gonio-bypass |
| 69 | 65-74 | m | exg     | filtering    |
| 68 | 65-74 | m | others  | filtering    |
| 35 | -64   | m | poag    | gonio-bypass |
| 83 | 75-89 | f | poag    | long-tube    |
| 82 | 75-89 | f | poag    | gonio-bypass |
| 80 | 75-89 | f | poag    | gonio-bypass |
| 83 | 75-89 | f | exg     | gonio-bypass |
| 53 | -64   | m | poag    | gonio-bypass |
| 63 | -64   | m | others  | long-tube    |
| 58 | -64   | f | others  | long-tube    |
| 51 | -64   | m | poag    | long-tube    |
| 82 | 75-89 | f | poag    | gonio-bypass |
| 83 | 75-89 | f | exg     | gonio-bypass |
| 76 | 75-89 | f | pacd    | ce/gsl       |
| 86 | 75-89 | m | poag    | long-tube    |
| 71 | 65-74 | m | pacd    | long-tube    |
| 77 | 75-89 | f | poag    | gonio-bypass |
| 52 | -64   | m | others  | filtering    |
| 87 | 75-89 | f | pacd    | ce/gsl       |
| 77 | 75-89 | f | poag    | gonio-bypass |
| 45 | -64   | f | poag    | gonio-bypass |
| 78 | 75-89 | m | exg     | filtering    |
| 87 | 75-89 | f | pacd    | ce/gsl       |
| 74 | 65-74 | f | exg     | gonio-bypass |
| 78 | 75-89 | f | poag    | gonio-bypass |
| 78 | 75-89 | f | exg     | gonio-bypass |

|    |       |   |         |              |
|----|-------|---|---------|--------------|
| 51 | -64   | f | others  | others       |
| 78 | 75-89 | f | poag    | gonio-bypass |
| 68 | 65-74 | f | pacd    | gonio-bypass |
| 57 | -64   | f | poag    | filtering    |
| 51 | -64   | m | others  | filtering    |
| 86 | 75-89 | m | pacd    | long-tube    |
| 63 | -64   | m | others  | others       |
| 71 | 65-74 | f | pacd    | others       |
| 89 | 75-89 | f | poag    | ce/gsl       |
| 40 | -64   | m | poag    | gonio-bypass |
| 59 | -64   | f | poag    | filtering    |
| 73 | 65-74 | m | poag    | long-tube    |
| 75 | 75-89 | m | exg     | long-tube    |
| 89 | 75-89 | f | poag    | ce/gsl       |
| 89 | 75-89 | f | poag    | gonio-bypass |
| 73 | 65-74 | f | poag    | gonio-bypass |
| 77 | 75-89 | m | poag    | gonio-bypass |
| 82 | 75-89 | f | poag    | gonio-bypass |
| 39 | -64   | m | develop | long-tube    |
| 83 | 75-89 | m | exg     | long-tube    |
| 40 | -64   | m | poag    | filtering    |
| 89 | 75-89 | f | poag    | gonio-bypass |
| 77 | 75-89 | m | poag    | gonio-bypass |
| 73 | 65-74 | f | poag    | gonio-bypass |
| 63 | -64   | f | poag    | filtering    |
| 64 | -64   | m | poag    | long-tube    |
| 76 | 75-89 | f | poag    | long-tube    |
| 52 | -64   | m | poag    | gonio-bypass |
| 55 | -64   | m | poag    | filtering    |
| 84 | 75-89 | f | pacd    | others       |
| 82 | 75-89 | f | others  | filtering    |
| 62 | -64   | m | poag    | long-tube    |
| 62 | -64   | m | poag    | others       |
| 21 | -64   | f | others  | others       |
| 52 | -64   | m | poag    | gonio-bypass |
| 83 | 75-89 | m | exg     | others       |
| 79 | 75-89 | f | exg     | ce/gsl       |
| 57 | -64   | m | poag    | gonio-bypass |
| 69 | 65-74 | f | pacd    | gonio-bypass |
| 64 | -64   | m | exg     | gonio-bypass |



|    |       |   |        |              |
|----|-------|---|--------|--------------|
| 73 | 65-74 | f | pacd   | ce/gsl       |
| 79 | 75-89 | f | exg    | ce/gsl       |
| 79 | 75-89 | f | poag   | gonio-bypass |
| 87 | 75-89 | m | poag   | others       |
| 74 | 65-74 | f | pacd   | ce/gsl       |
| 79 | 75-89 | m | poag   | gonio-bypass |
| 84 | 75-89 | f | exg    | long-tube    |
| 79 | 75-89 | f | poag   | gonio-bypass |
| 77 | 75-89 | f | poag   | gonio-bypass |
| 79 | 75-89 | m | poag   | long-tube    |
| 9  | -64   | f | others | others       |
| 62 | -64   | f | poag   | gonio-bypass |
| 59 | -64   | m | poag   | gonio-bypass |
| 68 | 65-74 | f | poag   | filtering    |
| 85 | 75-89 | f | others | long-tube    |
| 46 | -64   | m | others | others       |
| 79 | 75-89 | f | pacd   | gonio-bypass |
| 83 | 75-89 | m | exg    | long-tube    |
| 15 | -64   | f | others | gonio-bypass |
| 59 | -64   | m | others | others       |
| 85 | 75-89 | f | others | long-tube    |
| 86 | 75-89 | m | poag   | long-tube    |
| 75 | 75-89 | m | others | gonio-bypass |
| 71 | 65-74 | f | exg    | gonio-bypass |
| 69 | 65-74 | m | exg    | gonio-bypass |
| 59 | -64   | m | poag   | gonio-bypass |
| 64 | -64   | m | poag   | filtering    |
| 63 | -64   | f | exg    | long-tube    |
| 85 | 75-89 | f | exg    | long-tube    |
| 87 | 75-89 | m | poag   | long-tube    |
| 71 | 65-74 | m | exg    | gonio-bypass |
| 75 | 75-89 | m | others | gonio-bypass |
| 71 | 65-74 | f | poag   | gonio-bypass |
| 86 | 75-89 | f | poag   | gonio-bypass |
| 66 | 65-74 | f | poag   | filtering    |
| 90 | 90-   | f | exg    | long-tube    |
| 67 | 65-74 | m | poag   | long-tube    |
| 68 | 65-74 | f | others | others       |
| 74 | 65-74 | f | poag   | gonio-bypass |
| 58 | -64   | f | poag   | gonio-bypass |

|    |       |   |        |              |
|----|-------|---|--------|--------------|
| 86 | 75-89 | f | others | others       |
| 58 | -64   | f | others | others       |
| 75 | 75-89 | m | pacd   | ce/gsl       |
| 66 | 65-74 | f | poag   | gonio-bypass |
| 58 | -64   | f | poag   | gonio-bypass |
| 61 | -64   | m | others | long-tube    |
| 57 | -64   | m | poag   | long-tube    |
| 76 | 75-89 | m | exg    | long-tube    |
| 75 | 75-89 | m | pacd   | ce/gsl       |
| 72 | 65-74 | f | poag   | gonio-bypass |
| 69 | 65-74 | m | poag   | gonio-bypass |
| 82 | 75-89 | m | poag   | gonio-bypass |
| 87 | 75-89 | m | exg    | long-tube    |
| 72 | 65-74 | f | poag   | gonio-bypass |
| 69 | 65-74 | m | poag   | gonio-bypass |
| 64 | -64   | m | exg    | gonio-bypass |
| 82 | 75-89 | m | others | others       |
| 69 | 65-74 | m | others | others       |
| 73 | 65-74 | m | poag   | filtering    |
| 69 | 65-74 | f | others | long-tube    |
| 87 | 75-89 | m | poag   | gonio-bypass |
| 73 | 65-74 | m | pacd   | gonio-bypass |
| 68 | 65-74 | m | poag   | gonio-bypass |
| 78 | 75-89 | f | poag   | long-tube    |
| 82 | 75-89 | m | poag   | gonio-bypass |
| 87 | 75-89 | m | poag   | gonio-bypass |
| 69 | 65-74 | f | exg    | gonio-bypass |
| 73 | 65-74 | f | pacd   | gonio-bypass |
| 68 | 65-74 | m | poag   | gonio-bypass |
| 73 | 65-74 | m | others | long-tube    |
| 67 | 65-74 | m | poag   | gonio-bypass |
| 69 | 65-74 | f | pacd   | ce/gsl       |
| 80 | 75-89 | f | pacd   | gonio-bypass |
| 73 | 65-74 | m | others | filtering    |
| 66 | 65-74 | f | poag   | filtering    |
| 83 | 75-89 | f | exg    | long-tube    |
| 72 | 65-74 | m | others | filtering    |
| 80 | 75-89 | f | pacd   | ce/gsl       |
| 80 | 75-89 | f | pacd   | gonio-bypass |
| 62 | -64   | m | poag   | gonio-bypass |

|    |       |   |        |              |
|----|-------|---|--------|--------------|
| 56 | -64   | m | pacd   | gonio-bypass |
| 66 | 65-74 | f | poag   | filtering    |
| 36 | -64   | m | poag   | filtering    |
| 84 | 75-89 | m | pacd   | gonio-bypass |
| 80 | 75-89 | m | poag   | gonio-bypass |
| 84 | 75-89 | f | poag   | filtering    |
| 65 | 65-74 | m | others | long-tube    |
| 78 | 75-89 | f | pacd   | ce/gsl       |
| 84 | 75-89 | m | poag   | gonio-bypass |
| 82 | 75-89 | f | exg    | long-tube    |
| 82 | 75-89 | f | exg    | gonio-bypass |
| 79 | 75-89 | f | others | gonio-bypass |
| 67 | 65-74 | m | exg    | long-tube    |
| 56 | -64   | m | poag   | gonio-bypass |
| 73 | 65-74 | m | others | gonio-bypass |
| 69 | 65-74 | m | poag   | gonio-bypass |
| 67 | 65-74 | f | exg    | gonio-bypass |
| 75 | 75-89 | f | pacd   | ce/gsl       |
| 69 | 65-74 | m | poag   | gonio-bypass |
| 79 | 75-89 | f | poag   | long-tube    |
| 67 | 65-74 | m | poag   | gonio-bypass |
| 66 | 65-74 | m | exg    | gonio-bypass |
| 64 | -64   | f | pacd   | gonio-bypass |
| 90 | 90-   | m | exg    | long-tube    |
| 32 | -64   | m | others | long-tube    |
| 63 | -64   | f | poag   | filtering    |
| 56 | -64   | m | poag   | gonio-bypass |
| 80 | 75-89 | f | pacd   | ce/gsl       |
| 78 | 75-89 | f | pacd   | ce/gsl       |
| 64 | -64   | f | pacd   | gonio-bypass |
| 53 | -64   | m | poag   | gonio-bypass |
| 86 | 75-89 | m | poag   | long-tube    |
| 65 | 65-74 | f | poag   | gonio-bypass |
| 84 | 75-89 | m | poag   | gonio-bypass |
| 75 | 75-89 | f | exg    | gonio-bypass |
| 71 | 65-74 | f | poag   | gonio-bypass |
| 79 | 75-89 | f | exg    | long-tube    |
| 79 | 75-89 | f | others | filtering    |
| 78 | 75-89 | f | pacd   | ce/gsl       |
| 75 | 75-89 | f | exg    | gonio-bypass |

|    |       |   |         |              |
|----|-------|---|---------|--------------|
| 71 | 65-74 | f | poag    | gonio-bypass |
| 62 | -64   | m | poag    | filtering    |
| 61 | -64   | f | pacd    | ce/gsl       |
| 83 | 75-89 | f | poag    | gonio-bypass |
| 76 | 75-89 | f | pacd    | gonio-bypass |
| 69 | 65-74 | f | poag    | gonio-bypass |
| 88 | 75-89 | f | pacd    | gonio-bypass |
| 69 | 65-74 | f | others  | others       |
| 83 | 75-89 | m | poag    | gonio-bypass |
| 76 | 75-89 | f | pacd    | gonio-bypass |
| 65 | 65-74 | m | exg     | gonio-bypass |
| 39 | -64   | m | develop | gonio-bypass |
| 88 | 75-89 | f | pacd    | gonio-bypass |
| 78 | 75-89 | f | pacd    | ce/gsl       |
| 69 | 65-74 | m | poag    | gonio-bypass |
| 64 | -64   | m | exg     | gonio-bypass |
| 63 | -64   | f | poag    | filtering    |
| 56 | -64   | m | others  | long-tube    |
| 64 | -64   | m | others  | others       |
| 64 | -64   | m | exg     | gonio-bypass |
| 83 | 75-89 | f | poag    | gonio-bypass |
| 48 | -64   | m | poag    | filtering    |
| 49 | -64   | f | pacd    | ce/gsl       |
| 74 | 65-74 | f | exg     | gonio-bypass |
| 52 | -64   | f | poag    | filtering    |
| 48 | -64   | m | poag    | filtering    |
| 83 | 75-89 | m | others  | long-tube    |
| 70 | 65-74 | m | others  | filtering    |
| 64 | -64   | m | exg     | filtering    |
| 79 | 75-89 | f | poag    | long-tube    |
| 78 | 75-89 | f | pacd    | others       |
| 71 | 65-74 | f | poag    | ce/gsl       |
| 71 | 65-74 | m | poag    | filtering    |
| 78 | 75-89 | f | poag    | long-tube    |
| 64 | -64   | f | others  | long-tube    |
| 85 | 75-89 | f | exg     | gonio-bypass |
| 64 | -64   | m | poag    | gonio-bypass |
| 60 | -64   | m | poag    | gonio-bypass |
| 58 | -64   | m | poag    | gonio-bypass |
| 81 | 75-89 | m | others  | filtering    |

|    |       |   |        |              |
|----|-------|---|--------|--------------|
| 87 | 75-89 | m | exg    | others       |
| 74 | 65-74 | f | poag   | gonio-bypass |
| 69 | 65-74 | m | poag   | filtering    |
| 81 | 75-89 | f | exg    | gonio-bypass |
| 73 | 65-74 | m | poag   | gonio-bypass |
| 71 | 65-74 | m | exg    | filtering    |
| 65 | 65-74 | m | exg    | filtering    |
| 80 | 75-89 | f | exg    | gonio-bypass |
| 63 | -64   | f | exg    | gonio-bypass |
| 65 | 65-74 | m | exg    | filtering    |
| 54 | -64   | m | poag   | filtering    |
| 83 | 75-89 | m | others | long-tube    |
| 64 | -64   | m | others | filtering    |
| 79 | 75-89 | m | exg    | long-tube    |
| 80 | 75-89 | m | poag   | gonio-bypass |
| 65 | 65-74 | f | poag   | gonio-bypass |
| 63 | -64   | f | pacd   | ce/gsl       |
| 65 | 65-74 | f | others | others       |
| 81 | 75-89 | f | poag   | gonio-bypass |
| 63 | -64   | f | pacd   | ce/gsl       |
| 78 | 75-89 | f | poag   | gonio-bypass |
| 63 | -64   | f | pacd   | ce/gsl       |
| 80 | 75-89 | f | exg    | long-tube    |
| 81 | 75-89 | f | poag   | gonio-bypass |
| 60 | -64   | m | poag   | gonio-bypass |
| 88 | 75-89 | f | exg    | long-tube    |
| 42 | -64   | m | others | gonio-bypass |
| 64 | -64   | m | poag   | others       |
| 78 | 75-89 | f | poag   | gonio-bypass |
| 21 | -64   | f | others | long-tube    |
| 85 | 75-89 | f | poag   | gonio-bypass |
| 68 | 65-74 | m | exg    | gonio-bypass |
| 79 | 75-89 | m | exg    | gonio-bypass |
| 85 | 75-89 | f | poag   | gonio-bypass |
| 87 | 75-89 | f | others | long-tube    |
| 87 | 75-89 | f | poag   | long-tube    |
| 66 | 65-74 | f | poag   | gonio-bypass |
| 87 | 75-89 | f | exg    | long-tube    |
| 66 | 65-74 | f | poag   | gonio-bypass |
| 64 | -64   | m | others | filtering    |

|    |       |   |        |              |
|----|-------|---|--------|--------------|
| 87 | 75-89 | f | exg    | long-tube    |
| 66 | 65-74 | f | others | long-tube    |
| 88 | 75-89 | m | pacd   | ce/gsl       |
| 60 | -64   | m | poag   | gonio-bypass |
| 61 | -64   | m | others | gonio-bypass |
| 72 | 65-74 | f | poag   | long-tube    |
| 62 | -64   | f | poag   | long-tube    |
| 72 | 65-74 | f | poag   | ce/gsl       |
| 60 | -64   | m | poag   | gonio-bypass |
| 66 | 65-74 | m | poag   | filtering    |
| 42 | -64   | m | others | long-tube    |
| 72 | 65-74 | f | pacd   | ce/gsl       |
| 73 | 65-74 | m | others | long-tube    |
| 77 | 75-89 | m | exg    | long-tube    |
| 88 | 75-89 | m | pacd   | ce/gsl       |
| 81 | 75-89 | f | poag   | gonio-bypass |
| 61 | -64   | m | poag   | filtering    |
| 61 | -64   | m | others | gonio-bypass |
| 71 | 65-74 | f | exg    | gonio-bypass |
| 63 | -64   | f | poag   | gonio-bypass |
| 59 | -64   | m | poag   | filtering    |
| 73 | 65-74 | f | others | filtering    |
| 81 | 75-89 | f | pacd   | ce/gsl       |
| 81 | 75-89 | m | poag   | gonio-bypass |
| 57 | -64   | f | poag   | filtering    |
| 68 | 65-74 | f | pacd   | gonio-bypass |
| 83 | 75-89 | f | poag   | long-tube    |
| 73 | 65-74 | m | others | others       |
| 87 | 75-89 | f | others | gonio-bypass |
| 76 | 75-89 | f | poag   | gonio-bypass |
| 68 | 65-74 | f | pacd   | gonio-bypass |
| 72 | 65-74 | f | others | long-tube    |
| 69 | 65-74 | m | others | filtering    |
| 57 | -64   | f | others | others       |
| 84 | 75-89 | m | poag   | gonio-bypass |
| 68 | 65-74 | f | poag   | gonio-bypass |
| 87 | 75-89 | f | exg    | long-tube    |
| 53 | -64   | m | poag   | filtering    |
| 49 | -64   | m | others | filtering    |
| 53 | -64   | m | others | others       |

|    |       |   |        |              |
|----|-------|---|--------|--------------|
| 68 | 65-74 | f | poag   | gonio-bypass |
| 54 | -64   | m | others | gonio-bypass |
| 84 | 75-89 | m | poag   | long-tube    |
| 82 | 75-89 | m | others | long-tube    |
| 71 | 65-74 | m | others | long-tube    |
| 72 | 65-74 | m | poag   | gonio-bypass |
| 81 | 75-89 | f | pacd   | ce/gsl       |
| 67 | 65-74 | f | poag   | gonio-bypass |
| 73 | 65-74 | m | others | long-tube    |
| 70 | 65-74 | m | poag   | gonio-bypass |
| 68 | 65-74 | f | pacd   | ce/gsl       |
| 76 | 75-89 | f | pacd   | gonio-bypass |
| 67 | 65-74 | f | exg    | gonio-bypass |
| 71 | 65-74 | m | others | long-tube    |
| 87 | 75-89 | f | exg    | long-tube    |
| 77 | 75-89 | m | exg    | long-tube    |
| 84 | 75-89 | m | poag   | gonio-bypass |
| 68 | 65-74 | m | pacd   | ce/gsl       |
| 80 | 75-89 | f | poag   | gonio-bypass |
| 80 | 75-89 | f | poag   | gonio-bypass |
| 60 | -64   | m | poag   | long-tube    |
| 57 | -64   | f | poag   | others       |
| 72 | 65-74 | m | poag   | gonio-bypass |
| 84 | 75-89 | m | others | gonio-bypass |
| 69 | 65-74 | m | poag   | gonio-bypass |
| 67 | 65-74 | f | poag   | gonio-bypass |
| 84 | 75-89 | m | poag   | long-tube    |
| 73 | 65-74 | f | poag   | gonio-bypass |
| 69 | 65-74 | m | exg    | gonio-bypass |
| 90 | 90-   | f | poag   | long-tube    |
| 73 | 65-74 | m | others | long-tube    |
| 79 | 75-89 | f | exg    | gonio-bypass |
| 57 | -64   | m | poag   | filtering    |
| 55 | -64   | m | poag   | long-tube    |
| 87 | 75-89 | f | poag   | gonio-bypass |
| 75 | 75-89 | m | others | ce/gsl       |
| 77 | 75-89 | f | pacd   | ce/gsl       |
| 79 | 75-89 | f | exg    | gonio-bypass |
| 52 | -64   | f | pacd   | gonio-bypass |
| 87 | 75-89 | f | others | others       |

|    |       |   |        |              |
|----|-------|---|--------|--------------|
| 73 | 65-74 | m | others | long-tube    |
| 55 | -64   | f | poag   | long-tube    |
| 72 | 65-74 | m | others | long-tube    |
| 84 | 75-89 | f | others | others       |
| 74 | 65-74 | f | pacd   | ce/gsl       |
| 85 | 75-89 | f | exg    | gonio-bypass |
| 57 | -64   | m | others | long-tube    |
| 87 | 75-89 | f | poag   | gonio-bypass |
| 83 | 75-89 | f | pacd   | gonio-bypass |
| 53 | -64   | m | poag   | gonio-bypass |
| 57 | -64   | m | others | long-tube    |
| 66 | 65-74 | f | others | long-tube    |
| 64 | -64   | m | poag   | long-tube    |
| 84 | 75-89 | f | exg    | long-tube    |
| 68 | 65-74 | m | poag   | filtering    |
| 79 | 75-89 | f | poag   | gonio-bypass |
| 74 | 65-74 | f | poag   | gonio-bypass |
| 72 | 65-74 | f | poag   | gonio-bypass |
| 73 | 65-74 | f | pacd   | long-tube    |
| 88 | 75-89 | m | exg    | long-tube    |
| 50 | -64   | m | others | long-tube    |
| 62 | -64   | m | others | gonio-bypass |
| 69 | 65-74 | m | exg    | gonio-bypass |
| 72 | 65-74 | f | poag   | gonio-bypass |
| 79 | 75-89 | f | poag   | gonio-bypass |
| 67 | 65-74 | m | poag   | filtering    |
| 75 | 75-89 | m | poag   | gonio-bypass |
| 77 | 75-89 | m | exg    | gonio-bypass |
| 89 | 75-89 | f | pacd   | gonio-bypass |
| 65 | 65-74 | m | poag   | long-tube    |
| 60 | -64   | m | poag   | filtering    |
| 64 | -64   | m | exg    | filtering    |
| 64 | -64   | m | poag   | long-tube    |
| 76 | 75-89 | f | exg    | gonio-bypass |
| 67 | 65-74 | m | poag   | gonio-bypass |
| 63 | -64   | m | exg    | long-tube    |
| 69 | 65-74 | m | poag   | filtering    |
| 59 | -64   | m | poag   | filtering    |
| 67 | 65-74 | m | poag   | ce/gsl       |
| 73 | 65-74 | f | others | gonio-bypass |



|    |       |   |        |              |
|----|-------|---|--------|--------------|
| 89 | 75-89 | f | pacd   | gonio-bypass |
| 79 | 75-89 | m | exg    | long-tube    |
| 58 | -64   | f | poag   | filtering    |
| 82 | 75-89 | m | others | gonio-bypass |
| 63 | -64   | f | exg    | long-tube    |
| 73 | 65-74 | f | exg    | gonio-bypass |
| 86 | 75-89 | m | exg    | long-tube    |
| 79 | 75-89 | f | pacd   | others       |
| 82 | 75-89 | m | others | gonio-bypass |
| 29 | -64   | m | others | filtering    |
| 83 | 75-89 | f | pacd   | ce/gsl       |
| 70 | 65-74 | m | exg    | long-tube    |
| 89 | 75-89 | m | exg    | long-tube    |
| 65 | 65-74 | m | poag   | long-tube    |
| 68 | 65-74 | f | pacd   | gonio-bypass |
| 34 | -64   | m | poag   | gonio-bypass |
| 70 | 65-74 | m | exg    | long-tube    |
| 42 | -64   | m | others | long-tube    |
| 51 | -64   | f | poag   | gonio-bypass |
| 80 | 75-89 | f | exg    | gonio-bypass |
| 74 | 65-74 | m | others | others       |
| 75 | 75-89 | m | poag   | gonio-bypass |
| 69 | 65-74 | f | pacd   | gonio-bypass |
| 51 | -64   | f | poag   | gonio-bypass |
| 62 | -64   | m | poag   | filtering    |
| 79 | 75-89 | f | exg    | gonio-bypass |
| 62 | -64   | m | exg    | filtering    |
| 62 | -64   | f | poag   | filtering    |
| 74 | 65-74 | f | pacd   | long-tube    |
| 69 | 65-74 | f | pacd   | ce/gsl       |
| 79 | 75-89 | f | poag   | gonio-bypass |
| 77 | 75-89 | f | exg    | gonio-bypass |
| 80 | 75-89 | f | exg    | gonio-bypass |
| 76 | 75-89 | m | pacd   | gonio-bypass |
| 61 | -64   | m | others | filtering    |
| 11 | -64   | f | others | long-tube    |
| 69 | 65-74 | f | pacd   | ce/gsl       |
| 74 | 65-74 | f | exg    | gonio-bypass |
| 77 | 75-89 | f | exg    | gonio-bypass |
| 76 | 75-89 | f | exg    | filtering    |

|    |       |   |         |              |
|----|-------|---|---------|--------------|
| 72 | 65-74 | f | poag    | long-tube    |
| 84 | 75-89 | m | pacd    | ce/gsl       |
| 84 | 75-89 | m | pacd    | ce/gsl       |
| 79 | 75-89 | m | pacd    | ce/gsl       |
| 73 | 65-74 | m | poag    | gonio-bypass |
| 77 | 75-89 | f | pacd    | ce/gsl       |
| 83 | 75-89 | f | poag    | long-tube    |
| 76 | 75-89 | f | exg     | filtering    |
| 59 | -64   | m | poag    | filtering    |
| 79 | 75-89 | m | pacd    | ce/gsl       |
| 77 | 75-89 | f | pacd    | ce/gsl       |
| 60 | -64   | f | poag    | gonio-bypass |
| 39 | -64   | f | poag    | gonio-bypass |
| 68 | 65-74 | m | poag    | filtering    |
| 72 | 65-74 | f | others  | long-tube    |
| 54 | -64   | m | poag    | long-tube    |
| 52 | -64   | m | others  | gonio-bypass |
| 53 | -64   | f | pacd    | ce/gsl       |
| 68 | 65-74 | m | exg     | filtering    |
| 80 | 75-89 | m | others  | long-tube    |
| 70 | 65-74 | m | poag    | gonio-bypass |
| 60 | -64   | f | poag    | gonio-bypass |
| 53 | -64   | f | pacd    | ce/gsl       |
| 72 | 65-74 | f | pacd    | gonio-bypass |
| 68 | 65-74 | m | poag    | filtering    |
| 63 | -64   | m | poag    | filtering    |
| 79 | 75-89 | f | exg     | long-tube    |
| 69 | 65-74 | m | pacd    | ce/gsl       |
| 84 | 75-89 | m | exg     | gonio-bypass |
| 74 | 65-74 | m | poag    | gonio-bypass |
| 55 | -64   | f | poag    | gonio-bypass |
| 48 | -64   | f | poag    | gonio-bypass |
| 35 | -64   | f | develop | gonio-bypass |
| 39 | -64   | f | poag    | gonio-bypass |
| 73 | 65-74 | m | exg     | long-tube    |
| 72 | 65-74 | f | pacd    | others       |
| 76 | 75-89 | f | exg     | long-tube    |
| 49 | -64   | m | exg     | long-tube    |
| 79 | 75-89 | m | pacd    | ce/gsl       |
| 74 | 65-74 | m | others  | gonio-bypass |

|    |       |   |         |              |
|----|-------|---|---------|--------------|
| 68 | 65-74 | m | poag    | filtering    |
| 49 | -64   | m | exg     | long-tube    |
| 64 | -64   | f | poag    | long-tube    |
| 35 | -64   | f | others  | others       |
| 79 | 75-89 | m | pacd    | ce/gsl       |
| 61 | -64   | f | poag    | gonio-bypass |
| 73 | 65-74 | f | others  | filtering    |
| 69 | 65-74 | m | poag    | filtering    |
| 83 | 75-89 | m | others  | long-tube    |
| 61 | -64   | f | others  | others       |
| 77 | 75-89 | f | poag    | gonio-bypass |
| 71 | 65-74 | m | poag    | gonio-bypass |
| 66 | 65-74 | f | poag    | long-tube    |
| 10 | -64   | f | develop | long-tube    |
| 11 | -64   | f | others  | long-tube    |
| 75 | 75-89 | m | poag    | gonio-bypass |
| 62 | -64   | m | others  | ce/gsl       |
| 44 | -64   | m | others  | gonio-bypass |
| 78 | 75-89 | m | poag    | filtering    |
| 82 | 75-89 | f | pacd    | gonio-bypass |
| 61 | -64   | f | poag    | gonio-bypass |
| 62 | -64   | m | others  | gonio-bypass |
| 81 | 75-89 | f | exg     | long-tube    |
| 76 | 75-89 | f | exg     | filtering    |
| 75 | 75-89 | m | poag    | gonio-bypass |
| 75 | 75-89 | m | others  | others       |
| 59 | -64   | f | poag    | gonio-bypass |
| 44 | -64   | m | others  | gonio-bypass |
| 78 | 75-89 | m | poag    | filtering    |
| 68 | 65-74 | m | poag    | gonio-bypass |
| 57 | -64   | f | poag    | filtering    |
| 52 | -64   | m | others  | long-tube    |
| 69 | 65-74 | f | pacd    | ce/gsl       |
| 83 | 75-89 | m | exg     | gonio-bypass |
| 78 | 75-89 | f | poag    | gonio-bypass |
| 76 | 75-89 | f | poag    | gonio-bypass |
| 68 | 65-74 | m | poag    | gonio-bypass |
| 63 | -64   | m | poag    | filtering    |
| 83 | 75-89 | f | others  | long-tube    |
| 76 | 75-89 | f | exg     | filtering    |

|    |       |   |         |              |
|----|-------|---|---------|--------------|
| 76 | 75-89 | f | exg     | filtering    |
| 69 | 65-74 | f | pacd    | ce/gsl       |
| 92 | 90-   | f | exg     | ce/gsl       |
| 78 | 75-89 | f | poag    | gonio-bypass |
| 76 | 75-89 | f | poag    | gonio-bypass |
| 68 | 65-74 | m | poag    | gonio-bypass |
| 84 | 75-89 | m | pacd    | long-tube    |
| 63 | -64   | m | poag    | filtering    |
| 84 | 75-89 | f | others  | long-tube    |
| 73 | 65-74 | f | others  | long-tube    |
| 76 | 75-89 | f | poag    | gonio-bypass |
| 79 | 75-89 | m | pacd    | ce/gsl       |
| 82 | 75-89 | f | others  | others       |
| 92 | 90-   | f | pacd    | ce/gsl       |
| 72 | 65-74 | m | poag    | ce/gsl       |
| 72 | 65-74 | f | pacd    | ce/gsl       |
| 74 | 65-74 | m | others  | gonio-bypass |
| 72 | 65-74 | m | poag    | gonio-bypass |
| 69 | 65-74 | f | exg     | gonio-bypass |
| 82 | 75-89 | m | pacd    | long-tube    |
| 72 | 65-74 | m | others  | gonio-bypass |
| 73 | 65-74 | f | develop | long-tube    |
| 84 | 75-89 | m | pacd    | long-tube    |
| 93 | 90-   | m | exg     | long-tube    |
| 81 | 75-89 | f | poag    | long-tube    |
| 69 | 65-74 | f | exg     | gonio-bypass |
| 79 | 75-89 | m | pacd    | ce/gsl       |
| 73 | 65-74 | m | others  | gonio-bypass |
| 64 | -64   | m | poag    | filtering    |
| 73 | 65-74 | m | others  | others       |
| 76 | 75-89 | f | pacd    | ce/gsl       |
| 69 | 65-74 | m | poag    | long-tube    |
| 68 | 65-74 | m | poag    | long-tube    |
| 78 | 75-89 | f | pacd    | ce/gsl       |
| 68 | 65-74 | m | poag    | filtering    |
| 83 | 75-89 | m | exg     | gonio-bypass |
| 53 | -64   | m | poag    | gonio-bypass |
| 66 | 65-74 | m | exg     | others       |
| 78 | 75-89 | f | pacd    | ce/gsl       |
| 81 | 75-89 | m | exg     | long-tube    |

|    |       |   |        |              |
|----|-------|---|--------|--------------|
| 64 | -64   | m | others | long-tube    |
| 76 | 75-89 | f | pacd   | ce/gsl       |
| 94 | 90-   | f | pacd   | ce/gsl       |
| 88 | 75-89 | f | exg    | long-tube    |
| 94 | 90-   | f | pacd   | ce/gsl       |
| 73 | 65-74 | f | pacd   | ce/gsl       |
| 85 | 75-89 | f | pacd   | ce/gsl       |
| 61 | -64   | f | exg    | gonio-bypass |
| 53 | -64   | m | poag   | gonio-bypass |
| 73 | 65-74 | m | poag   | long-tube    |
| 73 | 65-74 | f | pacd   | ce/gsl       |
| 57 | -64   | m | poag   | gonio-bypass |
| 84 | 75-89 | m | poag   | long-tube    |
| 73 | 65-74 | m | poag   | filtering    |
| 80 | 75-89 | m | poag   | others       |
| 88 | 75-89 | f | exg    | long-tube    |
| 85 | 75-89 | f | pacd   | ce/gsl       |
| 69 | 65-74 | m | poag   | filtering    |
| 76 | 75-89 | m | poag   | gonio-bypass |
| 81 | 75-89 | f | poag   | long-tube    |
| 47 | -64   | m | poag   | filtering    |
| 67 | 65-74 | m | poag   | long-tube    |
| 67 | 65-74 | m | poag   | gonio-bypass |
| 73 | 65-74 | f | poag   | long-tube    |
| 56 | -64   | m | poag   | gonio-bypass |
| 58 | -64   | m | poag   | long-tube    |
| 66 | 65-74 | m | others | filtering    |
| 67 | 65-74 | m | others | others       |
| 77 | 75-89 | f | pacd   | ce/gsl       |
| 69 | 65-74 | m | pacd   | ce/gsl       |
| 75 | 75-89 | f | pacd   | gonio-bypass |
| 69 | 65-74 | f | poag   | filtering    |
| 85 | 75-89 | f | pacd   | long-tube    |
| 54 | -64   | m | poag   | filtering    |
| 48 | -64   | m | poag   | gonio-bypass |
| 48 | -64   | f | poag   | gonio-bypass |
| 63 | -64   | m | poag   | filtering    |
| 57 | -64   | m | poag   | filtering    |
| 75 | 75-89 | m | poag   | long-tube    |
| 67 | 65-74 | m | others | filtering    |

|    |       |   |        |              |
|----|-------|---|--------|--------------|
| 57 | -64   | m | poag   | filtering    |
| 85 | 75-89 | f | others | long-tube    |
| 62 | -64   | f | pacd   | ce/gsl       |
| 82 | 75-89 | m | pacd   | gonio-bypass |
| 54 | -64   | m | poag   | gonio-bypass |
| 74 | 65-74 | m | exg    | long-tube    |
| 69 | 65-74 | m | exg    | long-tube    |
| 62 | -64   | f | pacd   | ce/gsl       |
| 73 | 65-74 | m | poag   | gonio-bypass |
| 80 | 75-89 | f | pacd   | others       |
| 49 | -64   | m | poag   | filtering    |
| 71 | 65-74 | m | poag   | others       |
| 81 | 75-89 | f | pacd   | ce/gsl       |
| 64 | -64   | f | poag   | gonio-bypass |
| 79 | 75-89 | m | poag   | gonio-bypass |
| 74 | 65-74 | f | poag   | gonio-bypass |
| 58 | -64   | m | poag   | gonio-bypass |
| 72 | 65-74 | m | others | gonio-bypass |
| 83 | 75-89 | m | exg    | long-tube    |
| 81 | 75-89 | f | pacd   | ce/gsl       |
| 75 | 75-89 | m | poag   | gonio-bypass |
| 74 | 65-74 | m | poag   | gonio-bypass |
| 79 | 75-89 | m | exg    | gonio-bypass |
| 74 | 65-74 | f | poag   | gonio-bypass |
| 84 | 75-89 | f | poag   | filtering    |
| 85 | 75-89 | m | pacd   | ce/gsl       |
| 76 | 75-89 | f | pacd   | ce/gsl       |
| 68 | 65-74 | f | pacd   | ce/gsl       |
| 85 | 75-89 | f | exg    | gonio-bypass |
| 75 | 75-89 | m | poag   | gonio-bypass |
| 88 | 75-89 | m | poag   | gonio-bypass |
| 84 | 75-89 | f | poag   | filtering    |
| 86 | 75-89 | m | exg    | long-tube    |
| 74 | 65-74 | f | pacd   | ce/gsl       |
| 56 | -64   | f | poag   | ce/gsl       |
| 85 | 75-89 | m | pacd   | ce/gsl       |
| 76 | 75-89 | f | pacd   | ce/gsl       |
| 68 | 65-74 | f | pacd   | ce/gsl       |
| 61 | -64   | m | poag   | filtering    |
| 69 | 65-74 | f | poag   | filtering    |

|    |       |      |         |              |
|----|-------|------|---------|--------------|
| 20 | -64   | m    | others  | filtering    |
| 83 | 75-89 | m    | exg     | gonio-bypass |
| 56 | -64   | m    | poag    | filtering    |
| 54 | -64   | m    | poag    | filtering    |
| 52 | -64   | m    | poag    | long-tube    |
| 56 | -64   | m    | poag    | others       |
| 83 | 75-89 | m    | exg     | gonio-bypass |
| 73 | 65-74 | m    | poag    | gonio-bypass |
| 72 | 65-74 | m    | poag    | ce/gsl       |
| 36 | -64   | f    | develop | gonio-bypass |
| 56 | -64   | f    | poag    | long-tube    |
| 56 | -64   | f    | poag    | long-tube    |
| 41 | -64   | m    | poag    | long-tube    |
| 74 | 65-74 | f    | pacd    | ce/gsl       |
| 84 | 75-89 | f    | poag    | gonio-bypass |
| 72 | 65-74 | m    | poag    | gonio-bypass |
| 77 | 75-89 | m    | poag    | gonio-bypass |
| 65 | 65-74 | f    | pacd    | long-tube    |
| 73 | 65-74 | m    | pacd    | gonio-bypass |
| 55 | -64   | m    | others  | long-tube    |
| 80 | 75-89 | m    | others  | long-tube    |
| 76 | 75-89 | f    | pacd    | ce/gsl       |
| 80 | 75-89 | m    | poag    | gonio-bypass |
| 80 | 75-89 | f    | poag    | gonio-bypass |
| 64 | -64   | f    | others  | ce/gsl       |
| 72 | 65-74 | f    | others  | long-tube    |
| 84 | 75-89 | f    | pacd    | gonio-bypass |
| 80 | 75-89 | f    | poag    | gonio-bypass |
| 75 | 75-89 | f    | poag    | gonio-bypass |
| 70 | 65-74 | f    | others  | gonio-bypass |
| 74 | 65-74 | m    | others  | filtering    |
| 80 | 75-89 | m    | poag    | gonio-bypass |
| 76 | 75-89 | f    | pacd    | ce/gsl       |
| 72 | 65-74 | f    | others  | long-tube    |
| 70 | 65-74 | f    | others  | others       |
| 84 | 75-89 | f    | pacd    | gonio-bypass |
| 75 | 75-89 | f    | poag    | gonio-bypass |
| 73 | 65-74 | f    | exg     | gonio-bypass |
| 70 | 65-74 | ぞくはf | others  | gonio-bypass |
| 74 | 65-74 | m    | others  | filtering    |

|    |       |   |         |              |
|----|-------|---|---------|--------------|
| 58 | -64   | f | poag    | filtering    |
| 75 | 75-89 | m | poag    | others       |
| 55 | -64   | m | others  | long-tube    |
| 70 | 65-74 | m | pacd    | ce/gsl       |
| 62 | -64   | m | others  | others       |
| 70 | 65-74 | m | pacd    | ce/gsl       |
| 83 | 75-89 | f | pacd    | ce/gsl       |
| 59 | -64   | f | poag    | gonio-bypass |
| 74 | 65-74 | f | exg     | gonio-bypass |
| 47 | -64   | m | develop | gonio-bypass |
| 79 | 75-89 | m | exg     | ce/gsl       |
| 67 | 65-74 | m | poag    | filtering    |
| 77 | 75-89 | f | poag    | gonio-bypass |
| 35 | -64   | f | develop | others       |
| 83 | 75-89 | f | pacd    | ce/gsl       |
| 84 | 75-89 | m | exg     | gonio-bypass |
| 66 | 65-74 | m | poag    | gonio-bypass |
| 65 | 65-74 | m | poag    | filtering    |
| 77 | 75-89 | m | others  | long-tube    |
| 69 | 65-74 | f | poag    | gonio-bypass |
| 57 | -64   | f | pacd    | ce/gsl       |
| 83 | 75-89 | f | exg     | gonio-bypass |
| 65 | 65-74 | f | poag    | gonio-bypass |
| 64 | -64   | f | exg     | gonio-bypass |
| 57 | -64   | m | pacd    | ce/gsl       |
| 66 | 65-74 | m | poag    | filtering    |
| 69 | 65-74 | f | poag    | gonio-bypass |
| 66 | 65-74 | m | others  | others       |
| 76 | 75-89 | f | poag    | gonio-bypass |
| 68 | 65-74 | f | poag    | gonio-bypass |
| 66 | 65-74 | m | exg     | gonio-bypass |
| 53 | -64   | m | exg     | filtering    |
| 81 | 75-89 | m | exg     | long-tube    |
| 75 | 75-89 | m | poag    | gonio-bypass |
| 59 | -64   | f | poag    | gonio-bypass |
| 76 | 75-89 | f | poag    | gonio-bypass |
| 57 | -64   | f | poag    | gonio-bypass |
| 84 | 75-89 | m | poag    | long-tube    |
| 76 | 75-89 | m | poag    | long-tube    |
| 73 | 65-74 | m | exg     | long-tube    |



|    |       |   |         |              |
|----|-------|---|---------|--------------|
| 79 | 75-89 | m | exg     | long-tube    |
| 73 | 65-74 | m | exg     | gonio-bypass |
| 75 | 75-89 | m | poag    | gonio-bypass |
| 59 | -64   | f | poag    | gonio-bypass |
| 77 | 75-89 | m | poag    | filtering    |
| 75 | 75-89 | f | exg     | long-tube    |
| 8  | -64   | f | others  | others       |
| 75 | 75-89 | f | pacd    | gonio-bypass |
| 63 | -64   | m | poag    | gonio-bypass |
| 57 | -64   | m | poag    | gonio-bypass |
| 74 | 65-74 | f | pacd    | gonio-bypass |
| 82 | 75-89 | f | poag    | long-tube    |
| 60 | -64   | m | poag    | filtering    |
| 74 | 65-74 | f | exg     | long-tube    |
| 75 | 75-89 | f | exg     | long-tube    |
| 73 | 65-74 | f | poag    | others       |
| 77 | 75-89 | f | pacd    | ce/gsl       |
| 53 | -64   | m | pacd    | ce/gsl       |
| 63 | -64   | m | poag    | gonio-bypass |
| 75 | 75-89 | f | others  | others       |
| 74 | 65-74 | f | pacd    | gonio-bypass |
| 73 | 65-74 | m | poag    | gonio-bypass |
| 58 | -64   | m | others  | long-tube    |
| 89 | 75-89 | m | poag    | gonio-bypass |
| 85 | 75-89 | f | pacd    | long-tube    |
| 12 | -64   | f | develop | gonio-bypass |
| 12 | -64   | f | develop | gonio-bypass |
| 89 | 75-89 | m | exg     | long-tube    |
| 79 | 75-89 | m | poag    | gonio-bypass |
| 76 | 75-89 | f | poag    | gonio-bypass |
| 74 | 65-74 | m | poag    | gonio-bypass |
| 60 | -64   | m | poag    | gonio-bypass |
| 58 | -64   | m | poag    | gonio-bypass |
| 73 | 65-74 | m | poag    | gonio-bypass |
| 89 | 75-89 | m | exg     | long-tube    |
| 75 | 75-89 | f | pacd    | filtering    |
| 93 | 90-   | f | pacd    | ce/gsl       |
| 79 | 75-89 | m | poag    | gonio-bypass |
| 76 | 75-89 | f | poag    | gonio-bypass |
| 87 | 75-89 | f | poag    | gonio-bypass |

|    |       |   |        |              |
|----|-------|---|--------|--------------|
| 58 | -64   | m | poag   | gonio-bypass |
| 84 | 75-89 | m | pacd   | ce/gsl       |
| 64 | -64   | f | others | long-tube    |
| 34 | -64   | f | others | long-tube    |
| 73 | 65-74 | m | poag   | others       |
| 87 | 75-89 | f | poag   | gonio-bypass |
| 86 | 75-89 | m | poag   | gonio-bypass |
| 65 | 65-74 | f | pacd   | gonio-bypass |
| 60 | -64   | f | poag   | gonio-bypass |
| 64 | -64   | f | poag   | gonio-bypass |
| 70 | 65-74 | m | others | long-tube    |
| 58 | -64   | m | poag   | filtering    |
| 86 | 75-89 | f | poag   | gonio-bypass |
| 60 | -64   | f | poag   | gonio-bypass |
| 65 | 65-74 | f | pacd   | long-tube    |
| 31 | -64   | f | poag   | long-tube    |
| 84 | 75-89 | m | pacd   | ce/gsl       |
| 86 | 75-89 | m | exg    | ce/gsl       |
| 58 | -64   | m | poag   | gonio-bypass |
| 69 | 65-74 | m | poag   | filtering    |
| 87 | 75-89 | m | exg    | long-tube    |
| 67 | 65-74 | m | poag   | long-tube    |
| 25 | -64   | f | others | gonio-bypass |
| 87 | 75-89 | m | others | long-tube    |
| 86 | 75-89 | f | exg    | ce/gsl       |
| 91 | 90-   | m | pacd   | gonio-bypass |
| 69 | 65-74 | f | poag   | gonio-bypass |
| 53 | -64   | f | poag   | gonio-bypass |
| 62 | -64   | f | poag   | filtering    |
| 70 | 65-74 | f | poag   | long-tube    |
| 81 | 75-89 | f | pacd   | ce/gsl       |
| 64 | -64   | f | others | long-tube    |
| 81 | 75-89 | f | pacd   | ce/gsl       |
| 75 | 75-89 | m | pacd   | ce/gsl       |
| 78 | 75-89 | m | others | gonio-bypass |
| 69 | 65-74 | f | poag   | gonio-bypass |
| 72 | 65-74 | m | others | filtering    |
| 69 | 65-74 | m | others | long-tube    |
| 92 | 90-   | f | exg    | long-tube    |
| 75 | 75-89 | m | pacd   | ce/gsl       |

|    |       |   |        |              |
|----|-------|---|--------|--------------|
| 66 | 65-74 | m | exg    | gonio-bypass |
| 86 | 75-89 | f | pacd   | gonio-bypass |
| 84 | 75-89 | f | exg    | gonio-bypass |
| 90 | 90-   | f | exg    | long-tube    |
| 84 | 75-89 | m | poag   | long-tube    |
| 70 | 65-74 | f | poag   | long-tube    |
| 55 | -64   | m | poag   | filtering    |
| 84 | 75-89 | f | exg    | filtering    |
| 92 | 90-   | f | exg    | long-tube    |
| 70 | 65-74 | f | others | filtering    |
| 33 | -64   | m | others | long-tube    |
| 76 | 75-89 | f | pacd   | ce/gsl       |
| 77 | 75-89 | f | poag   | gonio-bypass |
| 66 | 65-74 | m | exg    | gonio-bypass |
| 86 | 75-89 | f | pacd   | gonio-bypass |
| 67 | 65-74 | m | poag   | filtering    |
| 34 | -64   | m | others | others       |
| 76 | 75-89 | f | pacd   | ce/gsl       |
| 79 | 75-89 | f | exg    | gonio-bypass |
| 70 | 65-74 | f | poag   | gonio-bypass |
| 77 | 75-89 | f | poag   | gonio-bypass |
| 90 | 90-   | f | exg    | long-tube    |
| 77 | 75-89 | f | exg    | long-tube    |
| 79 | 75-89 | f | others | gonio-bypass |
| 60 | -64   | m | others | filtering    |
| 91 | 90-   | f | pacd   | ce/gsl       |
| 75 | 75-89 | f | others | ce/gsl       |
| 64 | -64   | f | poag   | gonio-bypass |
| 66 | 65-74 | m | exg    | gonio-bypass |
| 90 | 90-   | f | exg    | long-tube    |
| 70 | 65-74 | m | poag   | filtering    |
| 91 | 90-   | f | pacd   | ce/gsl       |
| 90 | 90-   | f | poag   | gonio-bypass |
| 82 | 75-89 | f | pacd   | gonio-bypass |
| 82 | 75-89 | f | pacd   | gonio-bypass |
| 66 | 65-74 | m | poag   | long-tube    |
| 73 | 65-74 | m | exg    | others       |
| 34 | -64   | f | others | long-tube    |
| 90 | 90-   | f | poag   | gonio-bypass |
| 82 | 75-89 | f | pacd   | gonio-bypass |

|    |       |   |         |              |
|----|-------|---|---------|--------------|
| 82 | 75-89 | f | pacd    | gonio-bypass |
| 74 | 65-74 | m | others  | gonio-bypass |
| 74 | 65-74 | m | exg     | long-tube    |
| 87 | 75-89 | f | exg     | gonio-bypass |
| 81 | 75-89 | f | poag    | gonio-bypass |
| 74 | 65-74 | f | exg     | gonio-bypass |
| 90 | 90-   | f | exg     | long-tube    |
| 56 | -64   | m | poag    | filtering    |
| 75 | 75-89 | f | pacd    | others       |
| 81 | 75-89 | m | poag    | long-tube    |
| 58 | -64   | f | poag    | filtering    |
| 64 | -64   | m | others  | others       |
| 69 | 65-74 | f | poag    | gonio-bypass |
| 77 | 75-89 | f | others  | long-tube    |
| 81 | 75-89 | f | exg     | gonio-bypass |
| 50 | -64   | m | exg     | long-tube    |
| 70 | 65-74 | m | others  | long-tube    |
| 83 | 75-89 | f | exg     | filtering    |
| 62 | -64   | m | others  | long-tube    |
| 91 | 90-   | m | pacd    | gonio-bypass |
| 73 | 65-74 | m | poag    | gonio-bypass |
| 47 | -64   | f | develop | gonio-bypass |
| 74 | 65-74 | f | pacd    | long-tube    |
| 82 | 75-89 | f | pacd    | ce/gsl       |
| 73 | 65-74 | m | poag    | gonio-bypass |
| 74 | 65-74 | m | poag    | gonio-bypass |
| 47 | -64   | f | develop | gonio-bypass |
| 73 | 65-74 | f | others  | long-tube    |
| 66 | 65-74 | f | others  | filtering    |
| 82 | 75-89 | f | pacd    | ce/gsl       |
| 70 | 65-74 | f | others  | filtering    |
| 90 | 90-   | m | poag    | long-tube    |
| 73 | 65-74 | f | others  | long-tube    |
| 57 | -64   | m | develop | others       |
| 63 | -64   | f | pacd    | ce/gsl       |
| 78 | 75-89 | m | exg     | filtering    |
| 90 | 90-   | m | poag    | long-tube    |
| 69 | 65-74 | m | others  | long-tube    |
| 77 | 75-89 | f | pacd    | ce/gsl       |
| 69 | 65-74 | m | others  | filtering    |

|    |       |   |        |              |
|----|-------|---|--------|--------------|
| 62 | -64   | m | exg    | long-tube    |
| 63 | -64   | m | pacd   | ce/gsl       |
| 81 | 75-89 | m | exg    | ce/gsl       |
| 66 | 65-74 | m | poag   | gonio-bypass |
| 62 | -64   | m | poag   | gonio-bypass |
| 57 | -64   | m | poag   | gonio-bypass |
| 86 | 75-89 | m | exg    | long-tube    |
| 66 | 65-74 | m | others | filtering    |
| 33 | -64   | m | others | long-tube    |
| 81 | 75-89 | m | poag   | gonio-bypass |
| 62 | -64   | m | poag   | gonio-bypass |
| 80 | 75-89 | f | exg    | gonio-bypass |
| 69 | 65-74 | m | poag   | filtering    |
| 86 | 75-89 | m | poag   | long-tube    |
| 81 | 75-89 | f | exg    | long-tube    |
| 49 | -64   | f | poag   | ce/gsl       |
| 67 | 65-74 | m | exg    | others       |
| 63 | -64   | f | pacd   | ce/gsl       |
| 65 | 65-74 | f | poag   | gonio-bypass |
| 62 | -64   | m | others | gonio-bypass |
| 61 | -64   | f | poag   | gonio-bypass |
| 58 | -64   | m | poag   | gonio-bypass |
| 67 | 65-74 | m | exg    | gonio-bypass |
| 65 | 65-74 | f | poag   | gonio-bypass |
| 65 | 65-74 | m | exg    | gonio-bypass |
| 62 | -64   | m | others | gonio-bypass |
| 61 | -64   | f | poag   | gonio-bypass |
| 78 | 75-89 | m | exg    | long-tube    |
| 68 | 65-74 | f | exg    | gonio-bypass |
| 86 | 75-89 | m | poag   | long-tube    |
| 58 | -64   | m | poag   | gonio-bypass |
| 57 | -64   | m | others | long-tube    |
| 87 | 75-89 | f | poag   | gonio-bypass |
| 81 | 75-89 | f | exg    | gonio-bypass |
| 79 | 75-89 | f | pacd   | others       |
| 79 | 75-89 | f | exg    | ce/gsl       |
| 79 | 75-89 | f | others | others       |
| 93 | 90-   | m | poag   | gonio-bypass |
| 88 | 75-89 | f | exg    | ce/gsl       |
| 76 | 75-89 | f | poag   | gonio-bypass |

|    |       |    |        |              |
|----|-------|----|--------|--------------|
| 52 | -64   | f  | others | gonio-bypass |
| 87 | 75-89 | f  | poag   | gonio-bypass |
| 83 | 75-89 | f  | exg    | long-tube    |
| 79 | 75-89 | m  | exg    | long-tube    |
| 51 | -64   | m  | others | filtering    |
| 93 | 90-   | f  | poag   | gonio-bypass |
| 83 | 75-89 | f  | exg    | gonio-bypass |
| 78 | 75-89 | m  | poag   | gonio-bypass |
| 76 | 75-89 | m  | poag   | gonio-bypass |
| 74 | 65-74 | f  | poag   | filtering    |
| 34 | -64   | たm | others | long-tube    |
| 88 | 75-89 | f  | exg    | gonio-bypass |
| 61 | -64   | m  | pacd   | ce/gsl       |
| 78 | 75-89 | f  | others | long-tube    |
| 77 | 75-89 | m  | exg    | long-tube    |
| 79 | 75-89 | m  | exg    | long-tube    |
| 83 | 75-89 | m  | exg    | gonio-bypass |
| 70 | 65-74 | m  | others | gonio-bypass |
| 70 | 65-74 | m  | poag   | filtering    |
| 77 | 75-89 | m  | exg    | long-tube    |
| 72 | 65-74 | m  | poag   | long-tube    |
| 85 | 75-89 | f  | pacd   | ce/gsl       |
| 85 | 75-89 | f  | pacd   | ce/gsl       |
| 62 | -64   | m  | others | filtering    |
| 84 | 75-89 | f  | others | filtering    |
| 54 | -64   | f  | others | filtering    |
| 74 | 65-74 | m  | poag   | gonio-bypass |
| 67 | 65-74 | m  | others | filtering    |
| 62 | -64   | m  | others | filtering    |
| 87 | 75-89 | f  | poag   | long-tube    |
| 72 | 65-74 | f  | poag   | filtering    |
| 86 | 75-89 | m  | poag   | gonio-bypass |
| 80 | 75-89 | m  | poag   | gonio-bypass |
| 70 | 65-74 | f  | others | gonio-bypass |
| 86 | 75-89 | m  | exg    | long-tube    |
| 70 | 65-74 | m  | exg    | gonio-bypass |
| 90 | 90-   | f  | pacd   | ce/gsl       |
| 83 | 75-89 | f  | poag   | gonio-bypass |
| 79 | 75-89 | f  | pacd   | gonio-bypass |
| 86 | 75-89 | f  | exg    | long-tube    |

|    |       |   |         |              |
|----|-------|---|---------|--------------|
| 80 | 75-89 | m | poag    | gonio-bypass |
| 70 | 65-74 | f | others  | gonio-bypass |
| 86 | 75-89 | m | poag    | gonio-bypass |
| 90 | 90-   | f | pacd    | ce/gsl       |
| 70 | 65-74 | m | exg     | gonio-bypass |
| 75 | 75-89 | f | poag    | ce/gsl       |
| 83 | 75-89 | f | poag    | gonio-bypass |
| 57 | -64   | m | others  | gonio-bypass |
| 79 | 75-89 | f | pacd    | gonio-bypass |
| 75 | 75-89 | m | exg     | gonio-bypass |
| 40 | -64   | f | develop | gonio-bypass |
| 52 | -64   | f | others  | gonio-bypass |
| 85 | 75-89 | f | poag    | gonio-bypass |
| 59 | -64   | m | poag    | gonio-bypass |
| 78 | 75-89 | m | exg     | gonio-bypass |
| 40 | -64   | f | develop | gonio-bypass |
| 86 | 75-89 | f | exg     | long-tube    |
| 85 | 75-89 | m | others  | others       |
| 85 | 75-89 | m | others  | long-tube    |
| 85 | 75-89 | f | poag    | gonio-bypass |
| 59 | -64   | m | poag    | gonio-bypass |
| 66 | 65-74 | f | poag    | gonio-bypass |
| 68 | 65-74 | m | poag    | filtering    |
| 82 | 75-89 | m | poag    | long-tube    |
| 77 | 75-89 | m | poag    | gonio-bypass |
| 82 | 75-89 | m | poag    | gonio-bypass |
| 66 | 65-74 | f | poag    | gonio-bypass |
| 70 | 65-74 | m | others  | filtering    |
| 72 | 65-74 | f | poag    | long-tube    |
| 51 | -64   | f | develop | gonio-bypass |
| 65 | 65-74 | f | develop | gonio-bypass |
| 43 | -64   | f | poag    | gonio-bypass |
| 63 | -64   | m | poag    | filtering    |
| 75 | 75-89 | m | poag    | long-tube    |
| 84 | 75-89 | m | others  | others       |
| 47 | -64   | f | develop | filtering    |
| 68 | 65-74 | f | others  | long-tube    |
| 67 | 65-74 | f | poag    | gonio-bypass |
| 43 | -64   | f | develop | gonio-bypass |
| 69 | 65-74 | m | poag    | filtering    |

|    |       |   |         |              |
|----|-------|---|---------|--------------|
| 63 | -64   | m | poag    | filtering    |
| 47 | -64   | f | develop | filtering    |
| 77 | 75-89 | f | exg     | long-tube    |
| 77 | 75-89 | f | exg     | others       |
| 46 | -64   | m | others  | filtering    |
| 76 | 75-89 | f | pacd    | gonio-bypass |
| 84 | 75-89 | m | poag    | gonio-bypass |
| 69 | 65-74 | f | poag    | gonio-bypass |
| 68 | 65-74 | m | exg     | gonio-bypass |
| 81 | 75-89 | m | exg     | long-tube    |
| 58 | -64   | m | poag    | filtering    |
| 82 | 75-89 | m | exg     | long-tube    |
| 68 | 65-74 | m | exg     | ce/gsl       |
| 69 | 65-74 | f | poag    | gonio-bypass |
| 62 | -64   | f | poag    | filtering    |
| 69 | 65-74 | m | poag    | filtering    |
| 81 | 75-89 | f | poag    | long-tube    |
| 78 | 75-89 | f | others  | long-tube    |
| 71 | 65-74 | f | pacd    | ce/gsl       |
| 69 | 65-74 | m | poag    | filtering    |
| 67 | 65-74 | m | exg     | long-tube    |
| 64 | -64   | f | others  | long-tube    |
| 9  | -64   | f | others  | long-tube    |
| 71 | 65-74 | f | pacd    | ce/gsl       |
| 83 | 75-89 | m | poag    | gonio-bypass |
| 65 | 65-74 | f | poag    | gonio-bypass |
| 49 | -64   | f | poag    | gonio-bypass |
| 86 | 75-89 | f | poag    | long-tube    |
| 70 | 65-74 | m | exg     | long-tube    |
| 81 | 75-89 | f | poag    | gonio-bypass |
| 83 | 75-89 | m | poag    | gonio-bypass |
| 79 | 75-89 | m | others  | gonio-bypass |
| 65 | 65-74 | f | poag    | gonio-bypass |
| 86 | 75-89 | f | poag    | long-tube    |
| 86 | 75-89 | f | others  | long-tube    |
| 55 | -64   | m | poag    | long-tube    |
| 79 | 75-89 | m | others  | others       |
| 86 | 75-89 | f | poag    | gonio-bypass |
| 59 | -64   | f | poag    | gonio-bypass |
| 81 | 75-89 | f | poag    | gonio-bypass |



|    |       |   |         |              |
|----|-------|---|---------|--------------|
| 80 | 75-89 | m | poag    | gonio-bypass |
| 95 | 90-   | f | exg     | gonio-bypass |
| 75 | 75-89 | f | pacd    | ce/gsl       |
| 63 | -64   | m | poag    | gonio-bypass |
| 59 | -64   | f | poag    | gonio-bypass |
| 80 | 75-89 | m | pacd    | gonio-bypass |
| 61 | -64   | m | poag    | long-tube    |
| 75 | 75-89 | f | pacd    | gonio-bypass |
| 70 | 65-74 | m | exg     | gonio-bypass |
| 63 | -64   | m | poag    | gonio-bypass |
| 54 | -64   | f | others  | gonio-bypass |
| 70 | 65-74 | m | poag    | long-tube    |
| 41 | -64   | m | others  | long-tube    |
| 61 | -64   | m | poag    | long-tube    |
| 61 | -64   | m | others  | filtering    |
| 70 | 65-74 | m | exg     | gonio-bypass |
| 54 | -64   | f | others  | gonio-bypass |
| 80 | 75-89 | f | pacd    | gonio-bypass |
| 78 | 75-89 | m | poag    | long-tube    |
| 69 | 65-74 | f | poag    | gonio-bypass |
| 58 | -64   | m | pacd    | ce/gsl       |
| 80 | 75-89 | f | pacd    | gonio-bypass |
| 78 | 75-89 | m | poag    | long-tube    |
| 66 | 65-74 | f | others  | long-tube    |
| 35 | -64   | f | develop | others       |
| 88 | 75-89 | m | pacd    | others       |
| 76 | 75-89 | f | exg     | others       |
| 69 | 65-74 | f | poag    | gonio-bypass |
| 69 | 65-74 | m | exg     | gonio-bypass |
| 67 | 65-74 | f | poag    | gonio-bypass |
| 33 | -64   | f | others  | others       |
| 77 | 75-89 | f | poag    | gonio-bypass |
| 76 | 75-89 | m | exg     | gonio-bypass |
| 62 | -64   | f | poag    | gonio-bypass |
| 69 | 65-74 | m | exg     | long-tube    |
| 60 | -64   | f | others  | long-tube    |
| 76 | 75-89 | m | pacd    | ce/gsl       |
| 77 | 75-89 | f | poag    | gonio-bypass |
| 76 | 75-89 | m | exg     | gonio-bypass |
| 63 | -64   | f | exg     | gonio-bypass |

|    |       |   |         |              |
|----|-------|---|---------|--------------|
| 11 | -64   | m | develop | gonio-bypass |
| 76 | 75-89 | m | pacd    | ce/gsl       |
| 63 | -64   | f | pacd    | ce/gsl       |
| 49 | -64   | f | poag    | gonio-bypass |
| 70 | 65-74 | m | others  | long-tube    |
| 28 | -64   | m | others  | gonio-bypass |
| 78 | 75-89 | f | others  | gonio-bypass |
| 76 | 75-89 | m | others  | others       |
| 54 | -64   | m | exg     | gonio-bypass |
| 73 | 65-74 | m | exg     | long-tube    |
| 68 | 65-74 | m | poag    | long-tube    |
| 68 | 65-74 | m | exg     | filtering    |
| 58 | -64   | m | exg     | long-tube    |
| 79 | 75-89 | f | exg     | long-tube    |
| 57 | -64   | m | poag    | gonio-bypass |
| 55 | -64   | f | others  | filtering    |
| 84 | 75-89 | f | others  | long-tube    |
| 63 | -64   | f | poag    | filtering    |
| 80 | 75-89 | f | pacd    | long-tube    |
| 86 | 75-89 | f | poag    | gonio-bypass |
| 77 | 75-89 | f | poag    | gonio-bypass |
| 57 | -64   | m | poag    | gonio-bypass |
| 80 | 75-89 | f | pacd    | long-tube    |
| 70 | 65-74 | m | others  | long-tube    |
| 52 | -64   | f | others  | long-tube    |
| 11 | -64   | m | develop | others       |
| 11 | -64   | m | develop | others       |
| 77 | 75-89 | f | poag    | gonio-bypass |
| 66 | 65-74 | m | poag    | gonio-bypass |
| 73 | 65-74 | m | poag    | gonio-bypass |
| 59 | -64   | f | others  | gonio-bypass |
| 53 | -64   | f | poag    | filtering    |
| 70 | 65-74 | m | others  | gonio-bypass |
| 64 | -64   | m | develop | gonio-bypass |
| 65 | 65-74 | m | poag    | gonio-bypass |
| 66 | 65-74 | m | poag    | gonio-bypass |
| 60 | -64   | f | others  | gonio-bypass |
| 74 | 65-74 | m | pacd    | long-tube    |
| 68 | 65-74 | f | pacd    | ce/gsl       |
| 65 | 65-74 | m | others  | gonio-bypass |

|    |       |   |         |              |
|----|-------|---|---------|--------------|
| 76 | 75-89 | f | exg     | gonio-bypass |
| 69 | 65-74 | m | poag    | long-tube    |
| 42 | -64   | m | poag    | gonio-bypass |
| 63 | -64   | f | poag    | filtering    |
| 84 | 75-89 | f | others  | long-tube    |
| 80 | 75-89 | m | pacd    | ce/gsl       |
| 87 | 75-89 | m | pacd    | ce/gsl       |
| 68 | 65-74 | f | pacd    | ce/gsl       |
| 73 | 65-74 | m | poag    | gonio-bypass |
| 80 | 75-89 | m | poag    | filtering    |
| 87 | 75-89 | m | pacd    | ce/gsl       |
| 89 | 75-89 | f | exg     | gonio-bypass |
| 63 | -64   | m | poag    | gonio-bypass |
| 37 | -64   | m | develop | gonio-bypass |
| 73 | 65-74 | m | exg     | long-tube    |
| 71 | 65-74 | m | poag    | long-tube    |
| 89 | 75-89 | f | exg     | gonio-bypass |
| 72 | 65-74 | m | pacd    | gonio-bypass |
| 66 | 65-74 | m | poag    | gonio-bypass |
| 72 | 65-74 | m | pacd    | gonio-bypass |
| 78 | 75-89 | m | poag    | gonio-bypass |
| 63 | -64   | f | poag    | gonio-bypass |
| 67 | 65-74 | m | exg     | others       |
| 80 | 75-89 | m | pacd    | ce/gsl       |
| 78 | 75-89 | m | poag    | gonio-bypass |
| 75 | 75-89 | f | pacd    | gonio-bypass |
| 79 | 75-89 | m | poag    | gonio-bypass |
| 71 | 65-74 | m | poag    | ce/gsl       |
| 79 | 75-89 | m | poag    | gonio-bypass |
| 71 | 65-74 | m | poag    | gonio-bypass |
| 56 | -64   | f | others  | filtering    |
| 50 | -64   | m | poag    | filtering    |
| 72 | 65-74 | m | poag    | others       |
| 69 | 65-74 | m | exg     | gonio-bypass |
| 68 | 65-74 | m | poag    | long-tube    |
| 65 | 65-74 | f | others  | gonio-bypass |
| 79 | 75-89 | m | exg     | gonio-bypass |
